# Supplementary material
Source: publisher site journal article supplement (https://www.dovepress.com/article/396674)
Supplement: Supplementary file 1 [file get_supplementary_file.php]

# **SUPPLEMENTARY APPENDIX**

# STEP 1 SURVEY

**BACK PAIN PROFILING OMNIBUS**

**S0 - Country**

|           |          |
|-----------|----------|
| <b>US</b> | <b>1</b> |
| Russia    | 2        |
| Germany   | 3        |
| China     | 4        |

**PART 1: SCREENER**

**S5**

Please include standard question for each country

**S10**

Please record your gender.

**SA**

|        |   |
|--------|---|
| Male   | 1 |
| Female | 2 |

**S15**

Please record your age.

**Fill in precise age**

**NUMERIC**

|  |  |
|--|--|
|  |  |
|--|--|

 Years Old

**RECODE**

1. Under 18 years old **[CLOSE]**
2. 18-24 years old
3. 25-34 years old
4. 35-44 years old
5. 45-50 years old
6. 51-59 years old **[CLOSE FOR CHINA ONLY]**
7. 60-65 years old **[CLOSE FOR CHINA & RUSSIA]**
8. 66 years old and over **[CLOSE]**

**QUOTAS: (NAT REP)**

**S20**

**US Specific**

What is your current employment status?

- \_1 Employed full-time
- \_2 Employed part-time
- \_3 Self employed
- \_4 Unemployed but looking for a job
- \_5 Unemployed and not looking for a job/Long-term sick or disabled
- \_6 Full-time parent, homemaker
- \_7 Retired
- \_8 Student/Pupil

**RECODE QEMP**

**WORKINGSTATUS\_1**

**SINGLE PUNCH**

**\_1 Working IF QEMP =1 OR 2 OR 3**

**\_2 Not Working IF QEMP =4 OR 5 OR 6 OR 7 OR 8**

### Russia Specific

Статус занятости

Выберите пожалуйста один ответ

**SA**

- \_9 Полный рабочий день
- \_10 Не полный рабочий день
- \_11 Имеете собственное дело / являетесь работодателем
- \_12 Работаете внештатно / работаете на себя
- \_13 Безработный (-ая), но ищущую работу
- \_14 Безработный (-ая) и не ищущую работу / никогда не работал
- \_15 Домохозяйка
- \_16 Пенсионер
- \_17 Школьник / студент / обучение на дневном отделении
- \_18 Призывник

**RECODE QEMP**

**WORKINGSTATUS\_1**

**SINGLE PUNCH**

- \_1 Working IF QEMP =9 OR 10 OR 12 or 11**
- \_2 Not Working IF QEMP =13 OR 14 OR 15 OR 16 OR 17 or 18**

### Germany Specific

Was ist Ihr gegenwärtiger Beschäftigungsstatus?

Bitte eine Möglichkeit auswählen

- \_19 Vollzeit
- \_20 Teilzeit
- \_21 Selbstständig
- \_22 Arbeitslos aber auf der Suche nach einem Job
- \_23 Arbeitslos und nicht auf der Suche nach einem Job/ arbeitsunfähig
- \_24 Hausmann/ Hausfrau
- \_25 In Rente
- \_26 Student/ Schüler/ gantztägig in der Ausbildung

**RECODE QEMP**

**WORKINGSTATUS\_1**

**SINGLE PUNCH**

- \_1 Working IF QEMP=19 OR 20 OR 21**
- \_2 Not Working IF QEMP=22 OR 23 OR 24 OR 25 OR 26**

**China Specific**

Which of these best describes your current working status? 您目前的工作状况与以下哪项描述最为贴近?

- |    |                      |       |
|----|----------------------|-------|
| 27 | Full-time            | 全职    |
| 28 | Part-time            | 兼职    |
| 29 | Housewife / Houseman | 理家    |
| 30 | Currently unemployed | 目前失业中 |
| 31 | Retired              | 退休    |
| 32 | Apprentice           | 学徒    |
| 33 | Pupil / student      | 学生    |

**RECODE QEMP**

**WORKINGSTATUS\_1**

**SINGLE PUNCH**

**\_1 Working IF QEMP=27 OR 28**

**\_2 Not Working IF QEMP=29 OR 30 OR 31 OR 32 OR 33**

**PART 2: BACK PAIN DESCRIPTORS**

**Q1 – Primary Symptoms’ information**

Which of the following conditions have you, yourself, experienced in the past 6 months?

**SELECT ALL THAT APPLY**

**MA**

**RANDOMIZE STATEMENTS**

**CODE 998 – EXCLUSIVE – DO NOT ROTATE**

|     |                                       |
|-----|---------------------------------------|
| 1   | Sore / scratchy throat                |
| 2   | <b>Neck pain or shoulder pain</b>     |
| 3   | <b>Back pain</b>                      |
| 4   | Joint pain                            |
| 5   | Aches and cramps types of muscle pain |
| 6   | Strains and sprains                   |
| 7   | Bruises                               |
| 8   | Wet cough/Dry Cough                   |
| 998 | None                                  |

**IF CODE 2 OR 3, CONTINUE AND ASK Q2, OTHERWISE GO TO SOCIO-DEMOGRAPHICS**

**Q2**

How many of these pain episodes (neck/ shoulder/ back) have you experienced in the past 6 months?

**ENTER EXACT NUMBER**

**NUMERIC – RANGE 1 TO 99**

|  |  |
|--|--|
|  |  |
|--|--|

**[if more than 3 display text below]**

*As you experienced more than 3 of these pain episodes, please think about the 3 most recent ones for the following questions. Start from the most recent to the least recent one.*

**Q3**

How long would you say each of these pain episodes lasted?

**ENTER EXACT NUMBER OF MONTHS, WEEKS, DAYS AND HOURS**

**PLEASE ASK FOR EACH EPISODE AT Q.2 WHEN APPLICABLE**

**PLEASE SHOW:**

**01 TO 99 AT Q.2 = TEXT 1:** First episode / Most recent

**02 TO 99 AT Q2 = TEXT 2:** Second episode

**03 TO 99 AT Q.2 = TEXT 3:** Third episode

**NUMERIC**

|                      |                      |               |                      |
|----------------------|----------------------|---------------|----------------------|
| <input type="text"/> | <input type="text"/> | <b>MONTHS</b> | <b>RANGE 0- 6</b>    |
| <input type="text"/> | <input type="text"/> | <b>WEEKS</b>  | <b>RANGE 0- 30</b>   |
| <input type="text"/> | <input type="text"/> | <b>DAYS</b>   | <b>RANGE 0- 210</b>  |
| <input type="text"/> | <input type="text"/> | <b>HOURS</b>  | <b>RANGE 0- 5040</b> |

**IF SUM (MONTHS X 4) + WEEKS + (DAYS / 7) ≥ 12 IN Q3 FOR EACH EPISODE - GO TO SOCIO-DEMOGRAPHICS**



**ASK FOR EACH EPISODE NOT ≥ 12 AT Q.3**

**Q4**

For each of these pain episodes in the past 6 months, would you say you mostly suffered from upper, middle or lower back pain?

**SELECT ONE PER EPISODE**

**SA PER COLUMN**

Please use the image below to guide your selection:

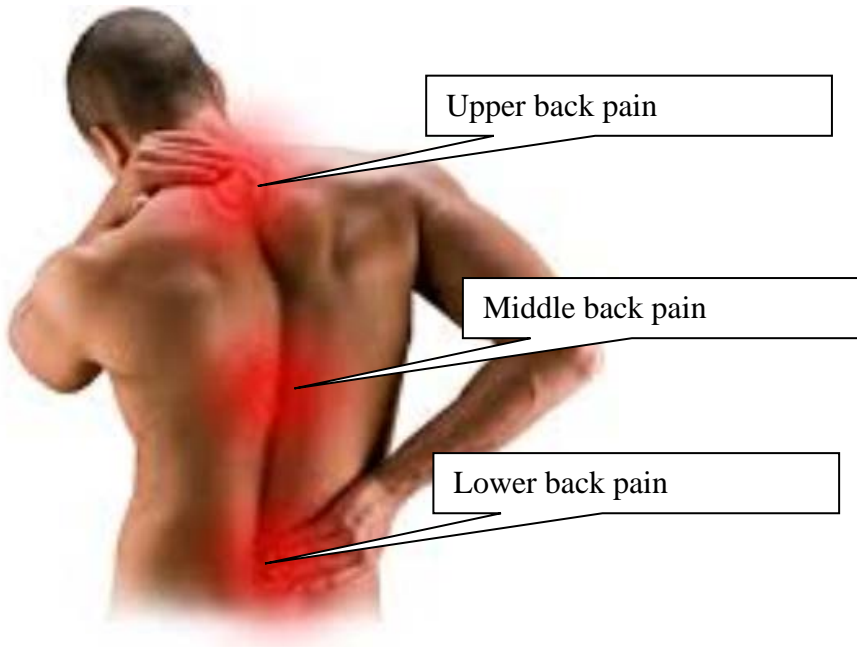

|                     | First episode /<br>Most recent | Second episode | Third<br>episode |
|---------------------|--------------------------------|----------------|------------------|
| Upper back pain     | 1                              | 1              | 1                |
| Middle back pain    | 2                              | 2              | 2                |
| Lower back pain     | 3                              | 3              | 3                |
| Not sure/Don't know | 4                              | 4              | 4                |
| None of the above   | 998                            | 998            | 998              |

**IF 998 FOR ALL 3 EPISODES GO TO SOCIO-DEMOGRAPHICS**

**ASK FOR EACH EPISODE NOT CODE 998 AT Q.4**

**Q5**

Indicate how **painful** each back pain episode was to you. Please register the worst level of pain you experienced during each episode, by using a 0 – 10 point scale where:

- 0 = No pain
- 10 = Worst possible pain

**SELECT ONE PER EPISODE**

**SA PER COLUMN**

**ACROSS THE TOP: PIPE IN NUMBER OF EPISODES [MAX 3]**

|                        | First episode / Most recent | Second episode | Third episode |
|------------------------|-----------------------------|----------------|---------------|
| 0 No pain              |                             |                |               |
| 1                      |                             |                |               |
| 2                      |                             |                |               |
| 3                      |                             |                |               |
| 4                      |                             |                |               |
| 5                      |                             |                |               |
| 6                      |                             |                |               |
| 7                      |                             |                |               |
| 8                      |                             |                |               |
| 9                      |                             |                |               |
| 10 Worst possible pain |                             |                |               |

**PART 3: BACK PAIN TRIGGERS**

**ASK FOR EACH EPISODE NOT CODE 998 AT Q.4**

**Q6**

We will show different types of activities that can be the cause of back pain.

For each we would like please select the activity, if any, that triggered one of your recent back pain.

**SELECT ONE PER EPISODE**

**SA PER COLUMN**

**RANDOMIZE STATEMENTS**

**CODE 998 – EXCLUSIVE – DO NOT ROTATE**

|                                                                                        | First episode /<br>Most recent | Second<br>episode | Third<br>episode |
|----------------------------------------------------------------------------------------|--------------------------------|-------------------|------------------|
| Sport activities                                                                       | 1                              | 1                 | 1                |
| Leisure activities (gardening, DIY etc.)                                               | 2                              | 2                 | 2                |
| Regular activities (carrying groceries,<br>sitting down or getting out of a seat etc.) | 3                              | 3                 | 3                |
| Other, please specify <b>COLLECT<br/>VERBATIM</b>                                      | 998                            | 998               | 998              |

ASK FOR EACH EPISODE CODE 1 AT Q.6

Q7

You said your back pain was due to sport activities. Which particular sport activity triggered back pain?

SELECT ONE PER EPISODE

SA PER COLUMN

RANDOMIZE STATEMENTS – PLEASE KEEP BLOCK OF CODES 1 AND 2 TOGETHER WHEN RANDOMIZING

CODE 998 – EXCLUSIVE – DO NOT ROTATE

|                                                   | First episode /<br>Most recent | Second<br>episode | Third<br>episode |
|---------------------------------------------------|--------------------------------|-------------------|------------------|
| American football                                 | 1                              | 1                 | 1                |
| Athletics (track and field sports)                | 2                              | 2                 | 2                |
| Badminton                                         | 3                              | 3                 | 3                |
| Baseball                                          | 4                              | 4                 | 4                |
| Basketball                                        | 5                              | 5                 | 5                |
| Bowling                                           | 8                              | 8                 | 8                |
| Cycling                                           | 9                              | 9                 | 9                |
| Golf                                              | 10                             | 10                | 10               |
| Gymnastics                                        | 11                             | 11                | 11               |
| Gym workout                                       | 12                             | 12                | 12               |
| Horse riding                                      | 13                             | 13                | 13               |
| Ice hockey                                        | 14                             | 14                | 14               |
| Martial arts                                      | 15                             | 15                | 15               |
| Rowing                                            | 16                             | 16                | 16               |
| Running                                           | 17                             | 17                | 17               |
| Sailing                                           | 18                             | 18                | 18               |
| Skiing                                            | 19                             | 19                | 19               |
| Soccer                                            | 20                             | 20                | 20               |
| Squash                                            | 21                             | 21                | 21               |
| Swimming                                          | 22                             | 22                | 22               |
| Table tennis                                      | 23                             | 23                | 23               |
| Tennis                                            | 24                             | 24                | 24               |
| Volleyball /Netball                               | 25                             | 25                | 25               |
| Weight lifting                                    | 26                             | 26                | 26               |
| Other, please specify <b>COLLECT<br/>VERBATIM</b> | 998                            | 998               | 998              |

ASK FOR EACH EPISODE CODE 2 AT Q.6

Q8

You said your back pain was due to leisure activities. Which particular leisure activity triggered back pain?

**SELECT ONE PER EPISODE**

**SA PER COLUMN**

**RANDOMIZE STATEMENTS –**

**CODE 998 – EXCLUSIVE – DO NOT ROTATE**

|                                                                                  | First episode /<br>Most recent | Second<br>episode | Third<br>episode |
|----------------------------------------------------------------------------------|--------------------------------|-------------------|------------------|
| Bowling                                                                          | 1                              | 1                 | 1                |
| Cycling/riding a bike                                                            | 2                              | 2                 | 2                |
| DIY                                                                              | 3                              | 3                 | 3                |
| Fishing                                                                          | 4                              | 4                 | 4                |
| Gardening                                                                        | 5                              | 5                 | 5                |
| <b>FOR DE/CHINA/RUSSIA:</b> Horse riding<br><b>FOR US ONLY:</b> Horseback riding | 6                              | 6                 | 6                |
| Playing ping pong                                                                | 7                              | 7                 | 7                |
| Rowing                                                                           | 8                              | 8                 | 8                |
| Running                                                                          | 9                              | 9                 | 9                |
| Sailing                                                                          | 10                             | 10                | 10               |
| Skateboarding                                                                    | 11                             | 11                | 11               |
| Skiing                                                                           | 12                             | 12                | 12               |
| Swimming                                                                         | 13                             | 13                | 13               |
| Using my computer                                                                | 14                             | 14                | 14               |
| Walking/hiking                                                                   | 15                             | 15                | 15               |
| Watching the TV                                                                  | 16                             | 16                | 16               |
| Other, please specify <b>COLLECT</b><br><b>VERBATIM</b>                          | 998                            | 998               | 998              |

**ASK FOR EACH EPISODE CODE 3 AT Q.6**

**Q9**

You said your back pain was due to regular activities. Which particular regular activity triggered back pain?

**SELECT ONE PER EPISODE**

**SA PER COLUMN**

**RANDOMIZE STATEMENTS –**

**CODE 998 – EXCLUSIVE – DO NOT ROTATE**

|                                                   | First episode /<br>Most recent | Second<br>episode | Third<br>episode |
|---------------------------------------------------|--------------------------------|-------------------|------------------|
| Bending down                                      | 1                              | 1                 | 1                |
| Carrying groceries                                | 2                              | 2                 | 2                |
| Doing a physical activity at work                 | 3                              | 3                 | 3                |
| Doing housework                                   | 4                              | 4                 | 4                |
| Leaning forward                                   | 5                              | 5                 | 5                |
| Lifting a heavy object                            | 6                              | 6                 | 6                |
| Playing with my children/relatives                | 7                              | 7                 | 7                |
| Poor posture                                      | 8                              | 8                 | 8                |
| Sexual activity                                   | 9                              | 9                 | 9                |
| Sitting at work                                   | 10                             | 10                | 10               |
| Sitting in front of computer                      | 11                             | 11                | 11               |
| Washing the dishes                                | 12                             | 12                | 12               |
| Work                                              | 13                             | 13                | 13               |
| Other, please specify <b>COLLECT<br/>VERBATIM</b> | 998                            | 998               | 998              |

**PART 4: TREATMENTS USED FOR BACK PAIN**

**ASK FOR EACH EPISODE NOT CODE 998 AT Q.4**

**Q10**

For each of the back pain episodes you have experienced in the past 6 months, which of the following means listed have you used to treat it?

**SELECT ALL THAT APPLY**

**MA PER COLUMN**

**RANDOMIZE STATEMENTS**

**CODE 998 – EXCLUSIVE – DO NOT ROTATE**

|                                                                                         | First episode /<br>Most recent | Second episode | Third<br>episode |
|-----------------------------------------------------------------------------------------|--------------------------------|----------------|------------------|
| Bed rest                                                                                | 1                              | 1              | 1                |
| Devices for pain management (e.g. TENS machines)                                        | 2                              | 2              | 2                |
| Exercises                                                                               | 3                              | 3              | 3                |
| Herbal/ nutritional supplements (such as zinc, vitamin C, etc.)                         | 4                              | 4              | 4                |
| Homeopathic products/medicine                                                           | 5                              | 5              | 5                |
| Local cold, e.g. ice packs, cold packs, etc....                                         | 6                              | 6              | 6                |
| Local heat, e.g. heat packs, heat patches, etc....                                      | 7                              | 7              | 7                |
| Massage                                                                                 | 8                              | 8              | 8                |
| Non-prescription products                                                               | 9                              | 9              | 9                |
| Other natural treatment/ home treatment (saltwater, steam, juices, certain foods, etc.) | 10                             | 10             | 10               |
| Physiotherapy                                                                           | 11                             | 11             | 11               |
| Prescription products                                                                   | 12                             | 12             | 12               |
| Osteopath manipulation/osteopathy                                                       | 13                             | 13             | 13               |
| Strapping/taping                                                                        | 14                             | 14             | 14               |
| Traditional Chinese Medicine (TCM)                                                      | 15                             | 15             | 15               |
| Did not treat <b>SINGLE CODE, KEEP ITS POSITION</b>                                     | 998                            | 998            | 998              |

**ASK FOR EACH EPISODE CODE 9 IN Q.10**

**Q11a**

Which non-prescription products have you used to treat your back pain in the last 6 months?

**SELECT ALL THAT APPLY**

**MA PER COLUMN**

**RANDOMIZE STATEMENTS**

**CODE 998 – EXCLUSIVE – DO NOT ROTATE**

|                                                        | First episode /<br>Most recent | Second<br>episode | Third<br>episode |
|--------------------------------------------------------|--------------------------------|-------------------|------------------|
| Creams or gels                                         | 1                              | 1                 | 1                |
| Muscle relaxant                                        | 2                              | 2                 | 2                |
| Oral painkillers (such as pills, caplets, sachets etc) | 3                              | 3                 | 3                |
| Patches                                                | 4                              | 4                 | 4                |
| Other, please specify <b>COLLECT VERBATIM</b>          | 998                            | 998               | 998              |

**ASK ONLY ONCE**

**Q11b**

For each of the non-prescription products you have used to treat your back pain in the last 6 months, would you use it again?

**SELECT ONE PER COLUMN**

**SA PER COLUMN**

**ACROSS THE TOP: PIPE IN TREATMENTS USED PAST 6 MONTHS**

**IE INCLUDE 'Creams or gels' IF ANY EPISODE CODE 1 AT Q11a**

**IE INCLUDE 'Muscle relaxant' IF ANY EPISODE CODE 2 AT Q11a**

**Etc...**

|                                   | Creams or<br>gels | Muscle<br>relaxant | Oral painkillers<br>(such as pills,<br>caplets,<br>sachets etc...) | Patches | Include<br>verbatim<br>from Q11a<br>1 <sup>st</sup> episode | Include<br>verbatim<br>from Q11a<br>2 <sup>nd</sup><br>episode | Include<br>verbatim from<br>Q11a<br>3 <sup>rd</sup> episode |
|-----------------------------------|-------------------|--------------------|--------------------------------------------------------------------|---------|-------------------------------------------------------------|----------------------------------------------------------------|-------------------------------------------------------------|
| Would definitely use it again     | 5                 | 5                  | 5                                                                  | 5       | 5                                                           | 5                                                              | 5                                                           |
| Would probably use it again       | 4                 | 4                  | 4                                                                  | 4       | 4                                                           | 4                                                              | 4                                                           |
| Might or might not use it again   | 3                 | 3                  | 3                                                                  | 3       | 3                                                           | 3                                                              | 3                                                           |
| Would probably not use it again   | 2                 | 2                  | 2                                                                  | 2       | 2                                                           | 2                                                              | 2                                                           |
| Would definitely not use it again | 1                 | 1                  | 1                                                                  | 1       | 1                                                           | 1                                                              | 1                                                           |



**ASK FOR EACH EPISODE CODE 12 IN Q.10**

**Q11c**

Which prescription products have you used to treat your back pain in the last 6 months?

**SELECT ALL THAT APPLY**

**MA PER COLUMN**

**RANDOMIZE STATEMENTS**

**CODE 998 – EXCLUSIVE – DO NOT ROTATE**

|                                                        | First episode<br>/ Most recent | Second<br>episode | Third<br>episode |
|--------------------------------------------------------|--------------------------------|-------------------|------------------|
| Creams or gels                                         | 1                              | 1                 | 1                |
| Muscle relaxant                                        | 2                              | 2                 | 2                |
| Oral painkillers (such as pills, caplets, sachets etc) | 3                              | 3                 | 3                |
| Patches                                                | 4                              | 4                 | 4                |
| Injections                                             | 5                              | 5                 | 5                |
| Other, please specify <b>COLLECT VERBATIM</b>          | 998                            | 998               | 998              |

**ASK ONLY ONCE**

**Q11d**

For each of the prescription products you have used to treat your back pain in the last 6 months, would you use it again?

**SELECT ONE PER COLUMN**

**SA PER COLUMN**

**ACROSS THE TOP: PIPE IN TREATMENTS USED PAST 6 MONTHS**

**IE INCLUDE 'Creams or gels' IF ANY EPISODE CODE 1 AT Q11c**

**IE INCLUDE 'Muscle relaxant' IF ANY EPISODE CODE 2 AT Q11c**

**Etc...**

|                                   | Creams or gels | Muscle relaxant | Oral painkillers (such as pills, caplets, sachets etc...) | Patches | Injections | Include verbatim from Q11c 1 <sup>st</sup> episode | Include verbatim from Q11c 2nd episode | Include verbatim from Q11c 3 <sup>rd</sup> episode |
|-----------------------------------|----------------|-----------------|-----------------------------------------------------------|---------|------------|----------------------------------------------------|----------------------------------------|----------------------------------------------------|
| Would definitely use it again     | 5              | 5               | 5                                                         | 5       | 5          | 5                                                  | 5                                      | 5                                                  |
| Would probably use it again       | 4              | 4               | 4                                                         | 4       | 4          | 4                                                  | 4                                      | 4                                                  |
| Might or might not use it again   | 3              | 3               | 3                                                         | 3       | 3          | 3                                                  | 3                                      | 3                                                  |
| Would probably not use it again   | 2              | 2               | 2                                                         | 2       | 2          | 2                                                  | 2                                      | 2                                                  |
| Would definitely not use it again | 1              | 1               | 1                                                         | 1       | 1          | 1                                                  | 1                                      | 1                                                  |

**ASK FOR EACH EPISODE NOT CODE 998 AT Q.4**

**Q12**

Which type of health care professional, if any, did you visit to treat your back pain in the last 6 months?

**SELECT ALL THAT APPLY**

**MA PER COLUMN**

**RANDOMIZE STATEMENTS**

**CODE 999 – EXCLUSIVE – DO NOT ROTATE**

|                                                | First episode / Most recent | Second episode | Third episode |
|------------------------------------------------|-----------------------------|----------------|---------------|
| Acupuncturist                                  | 1                           | 1              | 1             |
| Chiropractor                                   | 2                           | 2              | 2             |
| Clinic                                         | 3                           | 3              | 3             |
| General Practitioner                           | 4                           | 4              | 4             |
| Herbalist                                      | 5                           | 5              | 5             |
| Hospital/emergency room                        | 6                           | 6              | 6             |
| Osteopath                                      | 7                           | 7              | 7             |
| Pain Specialist                                | 8                           | 8              | 8             |
| Pharmacist                                     | 9                           | 9              | 9             |
| Physical Therapist / Physiotherapist           | 10                          | 10             | 10            |
| Physician                                      | 11                          | 11             | 11            |
| Physiatrist                                    | 12                          | 12             | 12            |
| Surgeon                                        | 13                          | 13             | 13            |
| TCM (Traditional Chinese Medicine) Specialist  | 14                          | 14             | 14            |
| Other, please specify <b>COLLECT VERBATIMS</b> | 998                         | 998            | 998           |
| None                                           | 999                         | 999            | 999           |

**PART 5: ADDITIONNAL DEMOS**

**D1**

**US Specific**

What is your marital status?

**SA**

- \_1 Single, never married
- \_2 Living with partner
- \_3 Married
- \_4 Widowed
- \_5 Divorced or separated

**Russia Specific**

Каково Ваше семейное положение. ?

(Выберите один вариант ответа)

**SA**

- \_6 Холост / не замужем
- \_7 Гражданский брак
- \_8 Женат / замужем
- \_9 Живу отдельно (не разведен(а))
- \_10 В официальном разводе
- \_11 Вдова / вдовец

**Germany Specific**

Sind Sie ...

(Bitte eine Antwort auswählen)

**SA**

- 12. Verheiratet oder in einer nichtehelichen Partnerschaft lebend
- 13. Verwitwet
- 14. Alleinstehend/nie verheiratet
- 15. Geschieden/getrennt lebend
- 16. In einer häuslichen Lebensgemeinschaft
- 17. Ich möchte hierzu keine Angabe machen

**China Specific**

请问您目前的婚姻状况是?

(单选)

|    |                       |          |
|----|-----------------------|----------|
| 18 | Single, never married | 单身，没有结过婚 |
| 19 | Married/ cohabitation | 已婚/同居    |
| 20 | Widowed               | 丧偶       |
| 21 | Divorced              | 离异       |
| 22 | Separated             | 分居       |
| 23 | Don't Know/Refuse     | 不知道/拒绝回答 |

**D2**

Including yourself, how many people are living in your household?

Please type in

**NUMERIC – RANGE 1 - 30**

Number of people in household \_\_\_\_\_

**SKIP D3 IF 1 AT D2****D3**

Do you have children aged 18 or below living in your household?

**SA**

Yes

No

**D4****IF CODE 1 OR 2 OR 3 AT S20**

What is your current occupation?

Please tick one circle only.

**SA**

|     |                                                        |
|-----|--------------------------------------------------------|
| 1   | Agricultural and fishery workers                       |
| 2   | Building and road construction workers                 |
| 3   | Craft and related trades workers                       |
| 4   | Fire department/police/army workers                    |
| 5   | Health care professionals/nursing/elderly care workers |
| 6   | Legislators, senior officials and managers             |
| 7   | Movers                                                 |
| 8   | Office workers                                         |
| 9   | Plant and machine operators and assemblers             |
| 10  | Professionals                                          |
| 11  | Professional sportsmen/women and dancers               |
| 12  | Retail workers                                         |
| 13  | School teachers                                        |
| 14  | Service workers                                        |
| 15  | Sport and fitness industry workers                     |
| 16  | Transport services and industry workers                |
| 998 | Others - Please specify:<br>/ _____ /                  |

**D5****US Specific**

Into which category does your **PERSONAL** pre-tax annual income from all sources fall? Please take into consideration all your income sources: salaries, scholarships, pension and Social Security payments, dividends from shares, income from rental properties, child support and alimony etc. Please note that we are not interested in the type of income source, only in your personal and total annual income.

Please tick one circle only.

**SA**

1. Under \$5,000
2. \$5,000 to \$9,999
3. \$10,000 to \$14,999
4. \$15,000 to \$19,999
5. \$20,000 to \$24,999
6. \$25,000 to \$29,999
7. \$30,000 to \$34,999
8. \$35,000 to \$39,999
9. \$40,000 to \$44,999
10. \$45,000 to \$49,999
11. \$50,000 to \$54,999
12. \$55,000 to \$59,999
13. \$60,000 to \$64,999
14. \$65,000 to \$69,999
15. \$70,000 to \$74,999
16. \$75,000 to \$79,999
17. \$80,000 to \$84,999
18. \$85,000 to \$89,999
19. \$90,000 to \$94,999
20. \$95,000 to \$99,999
21. \$100,000 to \$124,999
22. \$125,000 to \$149,999
23. \$150,000 to \$199,999
24. \$200,000 to \$249,999
25. \$250,000 or more
26. Prefer not to say

**Russia Specific**

К какой категории относится **СОВОКУПНЫЙ ЧИСТЫЙ** месячный доход Вашего **ДОМОХОЗЯЙСТВА** с учетом всех источников (т.е. доход после вычета налогов)?

Укажите все источники доходов, включая заработную плату, стипендию, пенсию и пособия социального страхования, дивиденды на акции, доход от аренды собственности, пособие на детей и алименты и т. д. Обратите внимание на то, что нас не интересует вид источника дохода, а только совокупный месячный доход всех членов домохозяйства.

**SA**

- |     |                        |
|-----|------------------------|
| _27 | Менее 3 000 Рублей     |
| _28 | 3 000 – 5 000 Рублей   |
| _29 | 5 001 – 7 000 Рублей   |
| _30 | 7 001 – 10 000 Рублей  |
| _31 | 10 001 – 15 000 Рублей |
| _32 | 15 001 – 20 000 Рублей |
| _33 | 20 001 – 30 000 Рублей |
| _34 | Более 30 000 Рублей    |
| _35 | Воздержусь от ответа   |

**Germany Specific**

Wie hoch ist das GEMEINSAME monatliche NETTOEINKOMMEN (nach Steuern) IHRES HAUSHALTS – das von allen Mitgliedern des Haushalts verdient wird?

Beziehen Sie ALLE Einnahmen aller Haushaltsmitglieder aus allen Einnahmequellen ein, z. B.: Löhne/Gehälter, Stipendien, Rente/ Sozialleistungen, Dividenden aus Aktienbesitz, Mieteinnahmen, Unterhalt, Alimente, etc. Wir sind nicht an der Art der Einkommensquelle interessiert, nur am monatlichen Gesamteinkommen, das von allen Mitgliedern des Haushalts verdient wird

SA

\_36 €0 - €500

\_37 €501-750

\_38 €751-1000

\_39 €1001-1250

\_40 €1251-1500

\_41 €1501-1750

\_42 €1751-2000

\_43 €2001-2500

\_44 €2501-3000

\_45 €3001-4000

\_46 €4001-5000

\_47 €5001-10,000

\_48 €10,001 und mehr

\_49 Keine Antwort

## China Specific

|    | 下面哪一项最能代表您家庭每月的总收入呢？请包括所有奖金，工资，津贴等在内。 | Please choose the group which represents your monthly household income. |
|----|---------------------------------------|-------------------------------------------------------------------------|
| 50 | 800元以下                                | Below 800 yuan                                                          |
| 51 | 800-999元                              | 800 – 999yuan                                                           |
| 52 | 1000-1199元                            | 1000 – 1199yuan                                                         |
| 53 | 1200-1499元                            | 1200 – 1499yuan                                                         |
| 54 | 1500-1999元                            | 1500 – 1999yuan                                                         |
| 55 | 2000-2499元                            | 2000 – 2499yuan                                                         |
| 56 | 2500-2999元                            | 2500 – 2999yuan                                                         |
| 57 | 3000-3499元                            | 3000 – 3499yuan                                                         |
| 58 | 3500-3999元                            | 3500 – 3999yuan                                                         |
| 59 | 4000-4499元                            | 4000 – 4499yuan                                                         |
| 60 | 4500-4999元                            | 4500 – 4999yuan                                                         |
| 61 | 5000-5499元                            | 5000 – 5499yuan                                                         |
| 62 | 5500-5999元                            | 5500 – 5999yuan                                                         |
| 63 | 6000-6499元                            | 6000 – 6499yuan                                                         |
| 64 | 6500-6999元                            | 6500 – 6999yuan                                                         |
| 65 | 7000-7499元                            | 7000 – 7499yuan                                                         |
| 66 | 7500-7999元                            | 7500 – 7999yuan                                                         |
| 67 | 8000-8999元                            | 8000 – 8999yuan                                                         |
| 68 | 9000-9999元                            | 9000 – 9999yuan                                                         |
| 69 | 10000-14999元                          | 10000 – 14999yuan                                                       |
| 70 | 15000-19999元                          | 15000 – 19999yuan                                                       |
| 71 | 20000-24999元                          | 20000 – 24999yuan                                                       |
| 72 | 25000-29999元                          | 25000 – 29999yuan                                                       |
| 73 | 30000或以上                              | 30000 or more                                                           |
| 74 | 不知道 / 拒绝回答                            | Not know / refuse to answer                                             |

US ONLY

**D6**

So that we know we are interviewing people of all backgrounds, which of the following best describes your ethnic or racial background?

Please tick one circle only.

**SA**

1. Asian or Pacific Islander
2. Black or African American
3. Caucasian or White
4. Hispanic
5. American Indian, Eskimo or Aleutian
6. Some other group



## STEP 2 SURVEY

**BACK PAIN PROFILING OMNIBUS**

Changes 27.06.17  
Changes 28.06.17

**S0 - Country**

|         |   |
|---------|---|
| US      | 1 |
| Russia  | 2 |
| Germany | 3 |
| China   | 4 |

**PART 1: SCREENER / SCREENER VALIDATION**

**S5**

Region

Please include standard question for each country

**S10**

Please record your gender.

**SA**

|        |   |
|--------|---|
| Male   | 1 |
| Female | 2 |

**S15**

Please record your age.

**Fill in precise age**

**NUMERIC**

|  |  |
|--|--|
|  |  |
|--|--|

 Years Old

**RECODE**

1. Under 18 years old **[CLOSE]**
2. 18-24 years old
3. 25-34 years old
4. 35-44 years old
5. 45-50 years old
6. 51-59 years old
7. 60-65 years old
8. 66 years old and over **[CLOSE]**

**QUOTAS: (NAT REP)**

**PART 1: WEBCRUISER SCREENER**

**WC1.** How many lower back pain episode(s) have you experienced in the past 6 months?

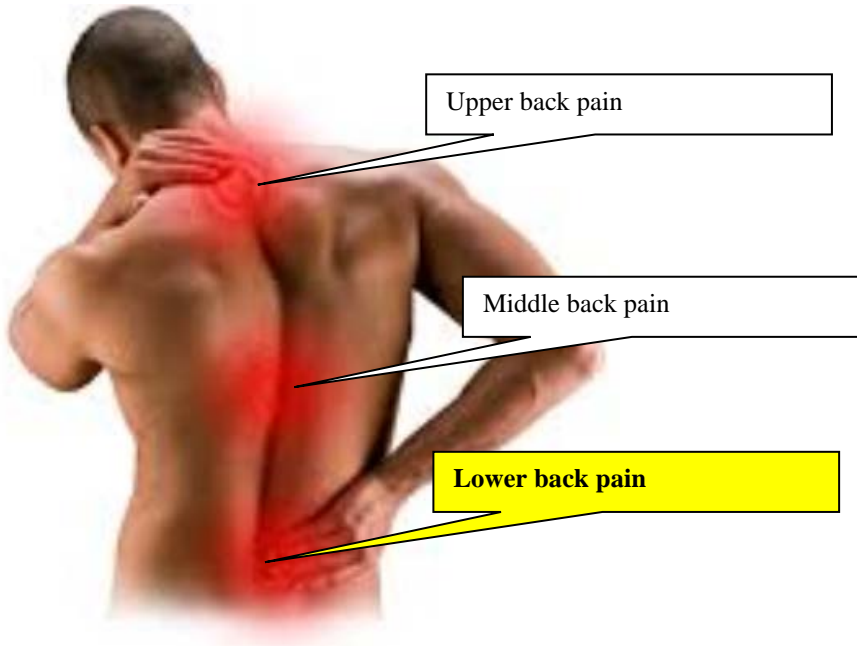

**NUMERIC 0-99**

|  |  |                                                  |
|--|--|--------------------------------------------------|
|  |  | lower back pain experienced in the past 6 months |
|--|--|--------------------------------------------------|

**IF "0", TERMINATE, OTHERWISE CONTINUE**

**WC2.** Among the lower back pain episode(s) you experienced in the past 6 months, how many lasted between 7 and 21 days?

**NUMERIC 0 - MAX NUMBER OF BACK PAIN EXPERIENCED IN WC1**

|  |  |                          |
|--|--|--------------------------|
|  |  | lasted between 7-21 days |
|--|--|--------------------------|

**IF "0", TERMINATE, OTHERWISE CONTINUE**

**WC3.** According to you, how many of your lower back pain episode(s) were triggered by the following activities?

**NUMERIC MIN: 0 – MAX: NUMBER OF BACK PAIN EXPERIENCED IN WC2 PER SPLIT AND PER TOTAL SUM**

|   |           | Number of back pain episode(s) triggered by the activity |
|---|-----------|----------------------------------------------------------|
| 1 | Badminton | / _ /                                                    |

|    |                                                                                     |     |
|----|-------------------------------------------------------------------------------------|-----|
| 2  | Basketball                                                                          | / / |
| 3  | Cycling                                                                             | / / |
| 4  | Golf                                                                                | / / |
| 5  | Gym workout                                                                         | / / |
| 6  | Running                                                                             | / / |
| 7  | Weight lifting                                                                      | / / |
| 98 | None of my <u>lower</u> back pain episode(s) were triggered by the above activities | 98  |

**IF CODE 98, TERMINATE, OTHERWISE RESPONDENT IS ELECTED AND CAN CONTINUE**

**PART 2: BACK PAIN DESCRIPTORS**

**PM NOTE: FOR WEBCRUISER STUDIES ALL SCREENING QUESTIONS ARE PLACED IN THE WEBBY – NO SCREENERS ARE ALLOWED IN THE REDIRECT/FOLLOW UP. PLEASE UPDATE THE FORECAST WITH THE NUMBER OF WEBBY QUESTIONS AFTER MOVING THEM. THIS WILL GENERATE AN EXTRA COST**

**Q1 – Primary Symptoms’ information**

Which of the following conditions have you, yourself, experienced in the past 6 months?

**SELECT ALL THAT APPLY**

**MA**

**RANDOMIZE STATEMENTS**

**CODE 998 – EXCLUSIVE – DO NOT ROTATE**

|     |                                       |
|-----|---------------------------------------|
| 1   | Severe headache/migraine              |
| 2   | Neck pain or shoulder pain            |
| 3   | Back pain                             |
| 4   | Joint pain                            |
| 5   | Aches and cramps types of muscle pain |
| 6   | Strains and sprains                   |
| 998 | None                                  |

**IF CODE 3, CONTINUE AND ASK Q2, OTHERWISE CLOSE**

**Q2**

How many of these back pain episodes have you experienced in the past 6 months?

**ENTER EXACT NUMBER**

**NUMERIC – RANGE 1 TO 99**

|  |  |
|--|--|
|  |  |
|--|--|

**[if more than 6 display text below]**

*As you have experienced more than 6 of these back pain episodes, please think about the 6 most recent ones for the following questions. Start from the most recent to the least recent one.*

**Q3**

How long would you say each of these back pain episodes lasted?

**ENTER EXACT NUMBER DAYS**

**FOR ONE WEEK COUNT 7 DAYS AND FOR ONE MONTH COUNT 30 DAYS**

**PLEASE ASK FOR EACH EPISODE AT Q.2 WHEN APPLICABLE**

**PLEASE SHOW:**

**01 TO 99 AT Q.2 = TEXT 1:** First episode / Most recent

**02 TO 99 AT Q2 = TEXT 2:** Second episode

**03 TO 99 AT Q.2 = TEXT 3:** Third episode

**04 TO 99 AT Q.2 = TEXT 4:** Fourth episode

**05 TO 99 AT Q2 = TEXT 5:** Fifth episode

**06 TO 99 AT Q.2 = TEXT 6:** Sixth episode

**REGISTER ALL PAST 6 MONTHS EPISODES**

**NUMERIC**

|  |  |
|--|--|
|  |  |
|--|--|

**DAYS**

**RANGE 0- 210**

**IF NUM <7 FOR EACH EPISODE - CLOSE**

**IF NUM >21 FOR EACH EPISODE – CLOSE**

**IF SUM >84 FOR ALL THE EPISODES IN THIS QUESTION – CLOSE**

**ASK FOR EACH EPISODE LASTING BETWEEN 7 AND 21 DAYS (INCLUDED)**

**Q4**

For each of these back pain episodes in the past 6 months, would you say you mostly suffered from upper, middle or lower back pain?

**SELECT ONE PER EPISODE**

**SA PER COLUMN**

Please use the image below to guide your selection:

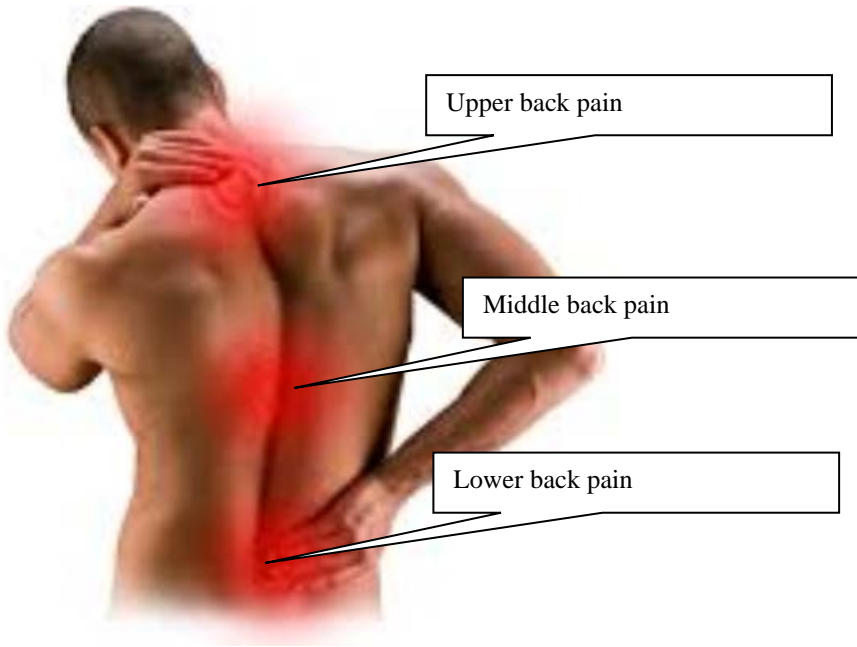

**PLEASE ASK FOR EACH EPISODE LASTING BETWEEN 7 AND 21 DAYS**

|                     |     |
|---------------------|-----|
| Upper back pain     | 1   |
| Middle back pain    | 2   |
| Lower back pain     | 3   |
| Not sure/Don't know | 4   |
| None of the above   | 998 |

**IF NO CODE 3 (LOWER BACK PAIN) FOR AT LEAST 1 EPISODE CLOSE**

**PART 3: LOWER BACK PAIN TRIGGERS**

**ASK FOR EACH EPISODE CODE 3 AT Q.4**

**Q5**

Which of the following activities would you say triggered your lower back pain?

**SELECT ONE PER EPISODE**

**SA PER COLUMN**

**PIPE IN ALL EPISODES CODE 3 IN Q4**

|               | <b>INSERT EPISODE<br/>CODE 3 IN Q4</b> | <b>INSERT EPISODE<br/>CODE 3 IN Q4</b> | <b>INSERT EPISODE<br/>CODE 3 IN Q4</b> |
|---------------|----------------------------------------|----------------------------------------|----------------------------------------|
| Badminton     | 1                                      | 1                                      | 1                                      |
| Basketball    | 2                                      | 2                                      | 2                                      |
| Cycling       | 3                                      | 3                                      | 3                                      |
| Golf          | 4                                      | 4                                      | 4                                      |
| A gym workout | 5                                      | 5                                      | 5                                      |



|                                                   |    |    |    |
|---------------------------------------------------|----|----|----|
| Running                                           | 6  | 6  | 6  |
| Weight lifting                                    | 7  | 7  | 7  |
| Other, please specify <b>COLLECT<br/>VERBATIM</b> | 98 | 98 | 98 |
| None in particular                                | 99 | 99 | 99 |

**IF CODES 98 OR 99 ONLY STOP INTERVIEW**

**USA ONLY IF CODES 4 OR 5 OR 7 NOT CODED FOR AT LEAST 1 EPISODE STOP INTERVIEW**

**RUSSIA ONLY IF CODES 5 OR 6 OR 7 NOT CODED FOR AT LEAST 1 EPISODE STOP INTERVIEW**

**GERMANY ONLY IF CODES 3 OR 5 OR 6 NOT CODED FOR AT LEAST 1 EPISODE STOP INTERVIEW**

**CHINA ONLY IF CODES 1 OR 2 OR 5 NOT CODED FOR AT LEAST 1 EPISODE STOP INTERVIEW**

**PART 4: FOCUS ON ACTIVITIES**

**Q10 FILTER**

**IF Q5 CONTAINS MORE THAN 1 ACTIVITY OUT OF THE ACTIVITIES OF INTEREST (SEE TABLE BELOW) SELECT ONE ACTIVITY RANDOMLY USING THE LEAST FILL CRITERIA. USE THE SELECTED ACTIVITY FOR ALL THE FOLLOWING QUESTIONS**

**CHINA ONLY: IF Q5 CONTAINS MORE THAN 1 ACTIVITY OUT OF THE ACTIVITIES OF INTEREST (SEE TABLE BELOW) THE ACTIVITY WILL BE SELECTED MANUALLY. USE THE SELECTED ACTIVITY FOR ALL THE FOLLOWING QUESTIONS.**

**CHINA ONLY : ALLOW INTERVIEWER TO SELECT ONLY ONE ACTIVITY**

**CHINA ONLY : PLEASE DISPLAY THE FOLLOWING SENTENCE**

**INTERVIEWER ONLY : PLEASE SELECT MANUALLY ONLY ONE ACTIVITY USING THE LEAST FILL CRITERIA**

|   |                | <b>US</b> | <b>RUSSIA</b> | <b>GERMANY</b> | <b>CHINA</b> |
|---|----------------|-----------|---------------|----------------|--------------|
| 1 | badminton      |           |               |                | X            |
| 2 | basketball     |           |               |                | X            |
| 3 | cycling        |           |               | X              |              |
| 4 | golf           | X         |               |                |              |
| 5 | a gym workout  | X         | X             | X              | X            |
| 6 | running        |           | X             | X              |              |
| 7 | weight lifting | X         | X             |                |              |

**Q10a**

Indicate how **painful** the lower back pain episode caused by **DISPLAY ACTIVITY SELECTED AT Q10 FILTER** was to you. Please indicate the worst level of pain you experienced during each episode, using the scale below, where:

- 0 = Almost no pain
- 10 = Worst possible pain

**Select a number on the scale for each episode**  
**SA PER COLUMN**

|                        | INSERT EPISODE<br>CODE 3 IN Q4<br>FROM ACTIVITY<br>SELECTED AT<br>Q10 FILTER | INSERT EPISODE<br>CODE 3 IN<br>Q4FROM<br>ACTIVITY<br>SELECTED AT Q10<br>FILTER | INSERT EPISODE<br>CODE 3 IN<br>Q4FROM<br>ACTIVITY<br>SELECTED AT Q10<br>FILTER |
|------------------------|------------------------------------------------------------------------------|--------------------------------------------------------------------------------|--------------------------------------------------------------------------------|
| 0 Almost no pain       |                                                                              |                                                                                |                                                                                |
| 1                      |                                                                              |                                                                                |                                                                                |
| 2                      |                                                                              |                                                                                |                                                                                |
| 3                      |                                                                              |                                                                                |                                                                                |
| 4                      |                                                                              |                                                                                |                                                                                |
| 5                      |                                                                              |                                                                                |                                                                                |
| 6                      |                                                                              |                                                                                |                                                                                |
| 7                      |                                                                              |                                                                                |                                                                                |
| 8                      |                                                                              |                                                                                |                                                                                |
| 9                      |                                                                              |                                                                                |                                                                                |
| 10 Worst possible pain |                                                                              |                                                                                |                                                                                |

**Q10b**

Please indicate which of the following caused lower back pain while you were participating in **DISPLAY ACTIVITY SELECTED AT Q10 FILTER**?

**SELECT ONE CAUSE PER EPISODE**  
**SA PER COLUMN**

|                                                                         | INSERT EPISODE<br>CODE 3 IN Q4<br>FROM ACTIVITY<br>SELECTED AT<br>Q10 FILTER | INSERT EPISODE<br>CODE 3 IN Q4<br>FROM ACTIVITY<br>SELECTED AT Q10<br>FILTER | INSERT EPISODE<br>CODE 3 IN Q4<br>FROM ACTIVITY<br>SELECTED AT Q10<br>FILTER |
|-------------------------------------------------------------------------|------------------------------------------------------------------------------|------------------------------------------------------------------------------|------------------------------------------------------------------------------|
| Wrong posture                                                           | 1                                                                            | 1                                                                            | 1                                                                            |
| Wrong movement                                                          | 2                                                                            | 2                                                                            | 2                                                                            |
| Too fast movement                                                       | 3                                                                            | 3                                                                            | 3                                                                            |
| Repetitive movement                                                     | 4                                                                            | 4                                                                            | 4                                                                            |
| Prolonged movement or activity                                          | 5                                                                            | 5                                                                            | 5                                                                            |
| Accident (fell off/down, got hurt<br>by an external object/person etc.) | 6                                                                            | 6                                                                            | 6                                                                            |
| Old injury                                                              | 9                                                                            | 9                                                                            | 9                                                                            |

|                                               |    |    |    |
|-----------------------------------------------|----|----|----|
| Other, please specify <b>COLLECT VERBATIM</b> | 98 | 98 | 98 |
| None in particular                            | 99 | 99 | 99 |

For the following questions, we would like to better understand how you participate in **DISPLAY ACTIVITY SELECTED AT Q10 FILTER**

**ASK FOR CYCLING ONLY (CODE 3 IN Q10 FILTER)**

**Q11**

When **DISPLAY ACTIVITY SELECTED AT Q10 FILTER** what type of bike do you ride most often?

**SELECT ONE ANSWER**

**SA**

|    |                                               |
|----|-----------------------------------------------|
| 1  | Road Bike                                     |
| 2  | Mountain bike                                 |
| 3  | Hybrid bike                                   |
| 4  | BMX bike                                      |
| 5  | Urban bike                                    |
| 98 | Other, please specify <b>COLLECT VERBATIM</b> |

**ASK FOR CYCLING ONLY (CODE 3 IN Q10 FILTER)**

**Q12**

When **DISPLAY ACTIVITY SELECTED AT Q10 FILTER** what distance do you most often cover?

**SELECT ONE ANSWER**

**SA**

|   |                              |
|---|------------------------------|
| 1 | Less than 10 kilometers      |
| 2 | Between 11 and 20 kilometers |
| 3 | Between 21 and 40 kilometers |
| 4 | Between 41 and 60 kilometers |
| 5 | Between 61 and 80 kilometers |
| 6 | More than 80 kilometers      |

**ASK FOR RUNNING ONLY (CODE 6 IN Q10 FILTER)**

**Q13**

When **DISPLAY ACTIVITY SELECTED AT Q10 FILTER** what distance do you most often cover?

**SELECT ONE ANSWER**

**SA**

|   |                              |
|---|------------------------------|
| 1 | Less than 5 kilometers       |
| 2 | Between 6 and 10 kilometers  |
| 3 | Between 11 and 20 kilometers |
| 4 | Between 21 and 30 kilometers |
| 5 | Between 31 and 40 kilometers |
| 6 | More than 40 kilometers      |

**ASK FOR GYM WORKOUT ONLY (CODE 5 IN Q10 FILTER)**

**Q14A**

When doing **DISPLAY ACTIVITY SELECTED AT Q10 FILTER** what particular equipment do you use?

**SELECT ALL THAT APPLY**

**MA**

|    |                                                    |
|----|----------------------------------------------------|
| 1  | Treadmill                                          |
| 2  | Weight/resistance machines                         |
| 3  | Hand weights/Dumbbells                             |
| 4  | Squat machine                                      |
| 5  | Elliptical trainer                                 |
| 6  | Barbells                                           |
| 7  | Abdominal machines                                 |
| 8  | Stationary/recumbent (lying down) bicycle machines |
| 9  | Rowing machines                                    |
| 10 | Stair climbing machines                            |
| 98 | Other, please specify <b>COLLECT VERBATIM</b>      |
| 99 | None <b>EXCLUSIVE</b>                              |

**ASK FOR GYM WORKOUT ONLY (CODE 5 IN Q10 FILTER)**

**PIPE IN ANSWERS FROM Q14A**

**IF CODE 99 SELECTED IN Q14A DO NOT SHOW Q14B**

**IF ONE CODE SELECTED IN Q14A AUTOCODE Q14b**

**Q14B**

And which equipment do you use most often?

**SELECT ONE ANSWER**

**SA**

|    |                                                                   |
|----|-------------------------------------------------------------------|
| 1  | Treadmill                                                         |
| 2  | Weight/resistance machines                                        |
| 3  | Hand weights/Dumbbells                                            |
| 4  | Squat machine                                                     |
| 5  | Elliptical trainer                                                |
| 6  | Barbells                                                          |
| 7  | Abdominal machines                                                |
| 8  | Stationary/recumbent (lying down) bicycle machines                |
| 9  | Rowing machines                                                   |
| 10 | Stair climbing machines                                           |
| 98 | Other, please specify <b>PIPE IN VERBATIM IF SELECTED AT Q14A</b> |

**ASK FOR GYM WORKOUT ONLY (CODE 5 IN Q10 FILTER)**

**Q15**

When doing **DISPLAY ACTIVITY SELECTED AT Q10 FILTER**, which particular classes or training sessions do you do?

**SELECT ALL THAT APPLY**

**MA**

|   |                                |
|---|--------------------------------|
| 1 | Yoga                           |
| 2 | Spin class/group cycling       |
| 3 | Circuit training               |
| 4 | Pilates                        |
| 5 | Skipping                       |
| 6 | Aerobics /step aerobics        |
| 7 | High impact aerobics/body pump |
| 8 | Boxercise/cardio kickboxing    |
| 9 | Body bootcamp                  |

|    |                                               |
|----|-----------------------------------------------|
| 10 | Barre/ballet based exercise                   |
| 11 | Zumba                                         |
| 12 | In water gym/exercises                        |
| 98 | Other, please specify <b>COLLECT VERBATIM</b> |
| 99 | None <b>EXCLUSIVE</b>                         |

**Q16A**

Do you participate in **DISPLAY ACTIVITY SELECTED AT Q10 FILTER** throughout the year?

**SELECT ONE ANSWER**

**SA**

|   |                       |
|---|-----------------------|
| 1 | Yes                   |
| 2 | No, during the season |

**ASK Q16B IF CODE 1 IN Q16A**

**Q16B**

How often do you participate in **DISPLAY ACTIVITY SELECTED AT Q10 FILTER** throughout the year?

**SELECT ONE ANSWER**

**SA**

|   |                                |
|---|--------------------------------|
| 1 | Every day, several times a day |
| 2 | 4 to 6 times a week            |
| 3 | 2 to 3 times a week            |
| 4 | Once a week                    |
| 5 | Every 2-3 weeks                |
| 6 | Every month                    |
| 7 | Every 2 to 3 months            |
| 8 | Every 4 to 6 months            |
| 9 | Less often                     |

**ASK Q16C IF CODE 2 IN Q16A**

**Q16C**

How often do you participate in **DISPLAY ACTIVITY SELECTED AT Q10 FILTER** during its season?

**SELECT ONE ANSWER**

**SA**

|   |                                |
|---|--------------------------------|
| 1 | Every day, several times a day |
| 2 | 4 to 6 times a week            |
| 3 | 2 to 3 times a week            |
| 4 | Once a week                    |
| 5 | Every 2-3 weeks                |
| 6 | Every month                    |
| 7 | Every 2 to 3 months            |
| 8 | Every 4 to 6 months            |
| 9 | Less often                     |

**Q16D**

Now, think of the last time you experienced lower back pain due to **DISPLAY ACTIVITY SELECTED AT Q10 FILTER**. How often had you been participating in **DISPLAY ACTIVITY SELECTED AT Q10 FILTER** during the

month prior to that lower back pain episode?

**SELECT ONE ANSWER**

SA

|   |                                |
|---|--------------------------------|
| 1 | Every day, several times a day |
| 2 | 4 to 6 times a week            |
| 3 | 2 to 3 times a week            |
| 4 | Once a week                    |
| 5 | Every 2-3 weeks                |
| 6 | Less often                     |

**Q17**

Do you always get lower back pain after participating in **DISPLAY ACTIVITY SELECTED AT Q10 FILTER**?

**SELECT ONE**

SA

|   |     |
|---|-----|
| 1 | Yes |
| 2 | No  |

**Q17A**

When you participate in **DISPLAY ACTIVITY SELECTED AT Q10 FILTER**, do you usually do it...?

**SELECT ALL THAT APPLY**

MA

|   |                                     |
|---|-------------------------------------|
| 1 | alone                               |
| 2 | with a friend/sports partner or two |
| 3 | with a coach or personal trainer    |
| 4 | within a group of people            |

**ASK Q17B IF 2 ANSWERS OR MORE IN Q17A**

**Q17B**

Thinking of the last 10 occasions you participated in **DISPLAY ACTIVITY SELECTED AT Q10 FILTER**, how many times did you do it **DISPLAY ANSWERS IN Q17A...**?

Please divide those last 10 occasions between the below options

**NUMERIC ENTER NUMBER**

**NUMERIC**

**DISPLAY ONLY CODES SELECTED IN Q17A**

|       |                                     |
|-------|-------------------------------------|
| / _ / | alone                               |
| / _ / | with a friend/sports partner or two |
| / _ / | with a coach or personal trainer    |
| / _ / | within a group of people            |

**TOTAL MUST BE 10**

**ASK Q17C IF CODE 3 IN Q17A**

**Q17C**

When you participate in **DISPLAY ACTIVITY SELECTED AT Q10 FILTER**, does the coach or personal trainer stay with you while you exercise or just gives you instructions and leave?

**SELECT ONE ANSWER**

SA

|   |                                    |
|---|------------------------------------|
| 1 | Stays with you                     |
| 2 | Gives you instructions then leaves |

**ASK Q18 IF CODE 3 IN Q17A**

**Q18**

You said you have a coach when you participate in **DISPLAY ACTIVITY SELECTED AT Q10 FILTER**.

Is this coach ...?

**SELECT ONE ANSWER**

**SA**

|    |                                     |
|----|-------------------------------------|
| 1  | Affiliated to a club or association |
| 2  | A private coach                     |
| 99 | I don't know                        |

**Q19**

Do you belong to any of the following organizations, to participate in **DISPLAY ACTIVITY SELECTED AT Q10 FILTER?**

**SELECT ALL THAT APPLY**

**MA**

|    |                                                              |
|----|--------------------------------------------------------------|
| 1  | Yes, an association                                          |
| 2  | Yes, a team/club                                             |
| 3  | Yes, to a Facebook group <b>(Adapt for Russia and China)</b> |
| 98 | Yes, other, please specify <b>COLLECT VERBATIM</b>           |
| 99 | None in particular <b>EXCLUSIVE</b>                          |

**ASK Q20 IF CODE 2 IN Q19**

**Q20**

Which type of club do you belong to?

**SELECT ALL THAT APPLY**

**MA**

|    |                                                                                     |
|----|-------------------------------------------------------------------------------------|
| 1  | Multiple activities chain club                                                      |
| 2  | A chain club dedicated to <b>DISPLAY ACTIVITY SELECTED AT Q10 FILTER activities</b> |
| 3  | Multiple activities local club                                                      |
| 4  | A local club dedicated to <b>DISPLAY ACTIVITY SELECTED AT Q10 FILTER activities</b> |
| 98 | Other, please specify <b>COLLECT VERBATIM</b>                                       |

**ASK Q21 IF CODE 1 IN Q19**

**Q21**

Which type of association do you belong to?

**SELECT ALL THAT APPLY**

**MA**

|    |                                               |
|----|-----------------------------------------------|
| 1  | University/college association                |
| 2  | Company association                           |
| 3  | Local/city association                        |
| 4  | National federation                           |
| 98 | Other, please specify <b>COLLECT VERBATIM</b> |



**Q22**

Now we would like to understand where you participate in **DISPLAY ACTIVITY SELECTED AT Q10 FILTER** .  
Is it ...?

**SELECT ALL THAT APPLY**

**MA**

|   |          |
|---|----------|
| 1 | Indoors  |
| 2 | Outdoors |

**ASK 23 IF CODES 1 & 2 IN Q22**

**Q23**

Where do you participate in **DISPLAY ACTIVITY SELECTED AT Q10 FILTER** most often?

**SELECT ONE ANSWER**

**SA**

|   |          |
|---|----------|
| 1 | Indoors  |
| 2 | Outdoors |

**ASK Q24 IF CODE 1 IN Q22**

**Q24**

When you participate in **DISPLAY ACTIVITY SELECTED AT Q10 FILTER** indoors, please can you specify where exactly?

**SELECT ALL THAT APPLY**

**MA**

|    |                                                                                                                                    |
|----|------------------------------------------------------------------------------------------------------------------------------------|
| 1  | In a gymnasium <b>DISPLAY FOR BADMINTON, BASKETBALL CODE 1 OR 2 AT Q10FILTER</b>                                                   |
| 2  | At an indoor court <b>DISPLAY FOR BADMINTON, BASKETBALL CODE 1 OR 2 AT Q10FILTER</b>                                               |
| 3  | At your gym/club <b>DISPLAY FOR GYM WORKOUT, WEIGHT LIFTING, RUNNING CODE 5 OR 7 OR 6 AT Q10FILTER</b>                             |
| 4  | At an indoor golf range <b>DISPLAY FOR GOLF CODE 4 AT Q10FILTER</b>                                                                |
| 5  | At an indoor golf simulator program <b>DISPLAY FOR GOLF CODE 4 AT Q10FILTER</b>                                                    |
| 6  | At an indoor track/dome <b>DISPLAY FOR RUNNING AND CYCLING CODE 6 OR 3 AT Q10FILTER</b>                                            |
| 7  | At home with your own material <b>DISPLAY FOR GYM WORKOUT, WEIGHT LIFTING, RUNNING, CYCLING CODE 5 OR 7 OR 6 OR 3 AT Q10FILTER</b> |
| 98 | At another indoor location, please specify <b>COLLECT VERBATIM</b>                                                                 |

**ASK Q25 IF CODE 2 IN Q22**

**Q25**

When you participate in **DISPLAY ACTIVITY SELECTED AT Q10 FILTER** outdoors, please can you specify where exactly?

**SELECT ALL THAT APPLY**

**MA**

|    |                                                                                                                                                |
|----|------------------------------------------------------------------------------------------------------------------------------------------------|
| 1  | In a park <b>DISPLAY FOR BADMINTON, BASKETBALL, GYM WORKOUT, WEIGHT LIFTING, RUNNING, CYCLING CODE 1 OR 2 OR 5 OR 7 OR 6 OR 3 AT Q10FILTER</b> |
| 2  | At an outdoor court <b>DISPLAY FOR BADMINTON, BASKETBALL CODE 1 OR 2 AT Q10FILTER</b>                                                          |
| 3  | On the street/road <b>DISPLAY FOR RUNNING, CYCLING, BADMINTON, BASKETBALL CODE 6 OR 3 OR 1 OR 2 AT Q10FILTER</b>                               |
| 4  | On a trail <b>DISPLAY FOR RUNNING &amp; CYCLING CODE 3 OR 6 AT Q10FILTER</b>                                                                   |
| 5  | At a golf course <b>DISPLAY FOR GOLF CODE 4 AT Q10FILTER</b>                                                                                   |
| 6  | At a driving range or any other place where you practice golf <b>DISPLAY FOR GOLF CODE 4 AT Q10FILTER</b>                                      |
| 7  | At an outdoor track <b>DISPLAY FOR RUNNING AND CYCLING CODE 6 OR 3 AT Q10FILTER</b>                                                            |
| 8  | On a fitness trail <b>DISPLAY FOR GYM WORKOUT CODE 5 AT Q10FILTER</b>                                                                          |
| 9  | At an outdoor gym <b>DISPLAY FOR GYM WORKOUT, WEIGHT LIFTING CODE 5 OR 7 AT Q10FILTER</b>                                                      |
| 10 | At home in my garden/courtyard <b>DISPLAY FOR BADMINTON, BASKETBALL, GOLF CODE 1 OR 2 OR 4 AT Q10FILTER</b>                                    |
| 98 | At another outdoor location, please specify <b>COLLECT VERBATIM</b>                                                                            |

**Q26**

What kind of events related to your participation in **DISPLAY ACTIVITY SELECTED AT Q10 FILTER** do you go to, even if only occasionally?

**SELECT ALL THAT APPLY**

**MA**

|    |                                                                                                        |
|----|--------------------------------------------------------------------------------------------------------|
| 1  | Crossfit competitions <b>DISPLAY FOR GYM WORKOUT code 5 AT Q10FILTER</b>                               |
| 2  | Competitions <b>DISPLAY FOR BADMINTON, BASKETBALL AND WEIGHT LIFTING CODE 1 OR 2 OR 7 AT Q10FILTER</b> |
| 3  | Races <b>DISPLAY FOR RUNNING AND CYCLING CODE 6 OR 3 AT Q10FILTER</b>                                  |
| 4  | Tournaments <b>DISPLAY FOR GOLF CODE 4 AT Q10FILTER</b>                                                |
| 5  | Fun-runs <b>DISPLAY FOR RUNNING CODE 6 AT Q10FILTER</b>                                                |
| 6  | Marathons/half marathons <b>DISPLAY FOR RUNNING CODE 6 AT Q10FILTER</b>                                |
| 7  | Matches <b>DISPLAY FOR BADMINTON, BASKETBALL CODE 1 OR 2 AT Q10FILTER</b>                              |
| 8  | Club open days                                                                                         |
| 9  | Exhibitions                                                                                            |
| 97 | Other competitions, please specify <b>COLLECT VERBATIM</b>                                             |
| 98 | Other events, please specify <b>COLLECT VERBATIM</b>                                                   |
| 99 | I do not participate in any events related to <b>DISPLAY ACTIVITY SELECTED AT Q10 FILTER</b>           |

**PART 5: TREATMENTS USED FOR LOWER BACK PAIN**

**Q27**

Which of the following ways listed below have you used to treat your lower back pain in the last 6 months?

**SELECT ALL THAT APPLY**

**MA**

**RANDOMIZE STATEMENTS**

**CODE 998 – EXCLUSIVE – DO NOT RANDOMIZE**

|                                                                                         |     |
|-----------------------------------------------------------------------------------------|-----|
| Bed rest                                                                                | 1   |
| Devices for pain management (e.g. TENS machines)                                        | 2   |
| Exercises (.e.g stretches, movement)                                                    | 3   |
| Herbal/ nutritional supplements (such as zinc, vitamin C, etc.)                         | 4   |
| Homeopathic products/medicine                                                           | 5   |
| Cold, e.g. ice packs, cold packs, etc....                                               | 6   |
| Heat, e.g. heat packs, heat patches, etc....                                            | 7   |
| Massage                                                                                 | 8   |
| Non-prescription products                                                               | 9   |
| Other natural treatment/ home treatment (saltwater, steam, juices, certain foods, etc.) | 10  |
| Physiotherapy                                                                           | 11  |
| Prescription products                                                                   | 12  |
| Osteopath manipulation/osteopathy                                                       | 13  |
| Strapping/taping                                                                        | 14  |
| Traditional Chinese Medicine (TCM)                                                      | 15  |
| Visiting a chiropractor                                                                 | 16  |
| Acupuncture                                                                             | 17  |
| Did not treat <b>SINGLE CODE, KEEP ITS POSITION</b>                                     | 998 |

**ASK IF CODE 9 IN Q.27**

**Q28**

Which non-prescription products have you used to treat your lower back pain in the last 6 months?

**SELECT ALL THAT APPLY**

**MA**

**RANDOMIZE STATEMENTS**

**CODE 998 – EXCLUSIVE – DO NOT RANDOMIZE**

|                                                         |     |
|---------------------------------------------------------|-----|
| Creams or gels                                          | 1   |
| Muscle relaxant                                         | 2   |
| Oral painkillers (such as pills, caplets, sachets etc.) | 3   |
| Patches (including hot and cold patches)                | 4   |
| Other, please specify <b>COLLECT VERBATIM</b>           | 998 |

**Q28B**

Would you use the treatment again in case you have another lower back pain episode?

**SELECT ONE ANSWER PER COLUMN**

**SA PER COL**

|  |                |                 |                  |                     |                              |
|--|----------------|-----------------|------------------|---------------------|------------------------------|
|  | Creams or gels | Muscle relaxant | Oral painkillers | Patches             | <b>SHOW VERBATIM IF CODE</b> |
|  |                |                 |                  | <b>SHOW ONLY IF</b> |                              |

|   | SHOW ONLY IF CODE 1 IS SELECTED IN Q28 | SHOW ONLY IF CODE 2 IS SELECTED IN Q28 | SHOW ONLY IF CODE 3 IS SELECTED IN Q28 | CODE 4 IS SELECTED IN Q28 | 998 SELECTED IN Q28 |
|---|----------------------------------------|----------------------------------------|----------------------------------------|---------------------------|---------------------|
| 1 | Yes                                    | Yes                                    | Yes                                    | Yes                       | Yes                 |
| 2 | No                                     | No                                     | No                                     | No                        | No                  |

ASK IF CODE 12 IN Q.27

**Q29**

Which prescription products have you used to treat your lower back pain in the last 6 months?

**SELECT ALL THAT APPLY**

MA

RANDOMIZE STATEMENTS

CODE 998 – EXCLUSIVE – DO NOT RANDOMIZE

|                                                         |     |
|---------------------------------------------------------|-----|
| Creams or gels                                          | 1   |
| Muscle relaxant                                         | 2   |
| Oral painkillers (such as pills, caplets, sachets etc.) | 3   |
| Patches (including hot and cold patches)                | 4   |
| Injections                                              | 5   |
| Other, please specify <b>COLLECT VERBATIM</b>           | 998 |

**Q29B**

Would you use the treatment again if you had another lower back pain episode?

**SELECT ONE ANSWER PER COLUMN**

SA PER COL

|   | Creams or gels<br>SHOW ONLY IF CODE 1 IS SELECTED IN Q29 | Muscle relaxant<br>SHOW ONLY IF CODE 2 IS SELECTED IN Q29 | Oral painkillers<br>SHOW ONLY IF CODE 3 IS SELECTED IN Q29 | Patches<br>SHOW ONLY IF CODE 4 IS SELECTED IN Q29 | Injections<br>SHOW ONLY IF CODE 5 IS SELECTED IN Q29 | SHOW VERBATIM IF CODE 998 SELECTED IN Q29 |
|---|----------------------------------------------------------|-----------------------------------------------------------|------------------------------------------------------------|---------------------------------------------------|------------------------------------------------------|-------------------------------------------|
| 1 | Yes                                                      | Yes                                                       | Yes                                                        | Yes                                               | Yes                                                  | Yes                                       |
| 2 | No                                                       | No                                                        | No                                                         | No                                                | No                                                   | No                                        |

**Q30**

Which type of health care professional, if any, have you visited to treat your lower back pain in the last 6 months?

**SELECT ALL THAT APPLY**

**MA PER COLUMN**

**RANDOMIZE STATEMENTS**

**IF ANY AUTO SELECTED ANSWERS (CODE 1 OR 2 OR 6 OR 9 OR 13) – DO NOT DISPLAY OPTION 999 AND ALLOW RESPONDENT TO SELECT ADDITIONAL ANSWER OR CONTINUE WITH THE NEXT QUESTION  
CODE 999 – EXCLUSIVE – DO NOT RANDOMIZE CODE 998 AND 999**

|                                                                                                        |     |
|--------------------------------------------------------------------------------------------------------|-----|
| Acupuncturist (AUTO SELECT IF CODE 17 IS SELECTED IN Q27)                                              | 1   |
| Chiropractor (AUTO SELECT IF CODE 16 IS SELECTED IN Q27)                                               | 2   |
| General Practitioner/Family doctor                                                                     | 3   |
| Herbalist                                                                                              | 4   |
| Hospital/emergency room, Clinic                                                                        | 5   |
| Osteopath (AUTO SELECT IF CODE 13 IS SELECTED IN Q27)                                                  | 6   |
| Pain Specialist                                                                                        | 7   |
| Pharmacist                                                                                             | 8   |
| Physical Therapist / Physiotherapist (AUTO SELECT IF CODE 11 IS SELECTED IN Q27 EXCEPT CHINA)          | 9   |
| Physician                                                                                              | 10  |
| Physiatrist/Rehab physician                                                                            | 11  |
| Surgeon                                                                                                | 12  |
| TCM (Traditional Chinese Medicine) Specialist (AUTO SELECT IF CODE 15 IS SELECTED IN Q27 EXCEPT CHINA) | 13  |
| Massage therapist                                                                                      | 14  |
| Other, please specify COLLECT VERBATIMS                                                                | 998 |
| None                                                                                                   | 999 |

**Q31**

Usually, with your lower back pain, do you also get...?

**SELECT ALL THAT APPLY**

**MA**

|   |                                      |
|---|--------------------------------------|
| 1 | upper back pain                      |
| 2 | middle back pain                     |
| 3 | pain spreading down your leg or legs |
| 4 | none of these EXCLUSIVE              |

**Q32**

Usually, at what time of the day do you mostly experience lower back pain?

**SELECT ONE ANSWER**

SA

|   |                         |
|---|-------------------------|
| 1 | In the morning          |
| 2 | In the afternoon        |
| 3 | In the evening/at night |
| 4 | Throughout the day      |

**Q33**

At what age, did you start having lower back pain problems?

Fill in exact age

NUMERIC RANGE: MINIM: 0 MAXIM: RESPONDENT AGE

|                      |                      |           |
|----------------------|----------------------|-----------|
| <input type="text"/> | <input type="text"/> | Years Old |
|----------------------|----------------------|-----------|

**Q34A**

Usually, when does your lower back pain start?

**SELECT ONE**

SA

|   |                 |
|---|-----------------|
| 1 | During exercise |
| 2 | After exercise  |

ASK Q34B IF CODE 2 IN Q34A

**Q34B**

**Q34**

On average, how long after you have been exercising does your lower back pain start?

Fill in precise hours and days

NUMERIC

|                      |                      |                   |
|----------------------|----------------------|-------------------|
| <input type="text"/> | <input type="text"/> | DAYS RANGE: 0-360 |
|----------------------|----------------------|-------------------|

|                      |                      |                   |
|----------------------|----------------------|-------------------|
| <input type="text"/> | <input type="text"/> | HOURS RANGE: 0-24 |
|----------------------|----------------------|-------------------|

**Q35**

On average, does your lower back pain get better after rest or worse?

**SELECT ONE ANSWER**

SA

|   |        |
|---|--------|
| 1 | Better |
| 2 | Worse  |

|                                          |
|------------------------------------------|
| <b>PART 6: IMPACT OF LOWER BACK PAIN</b> |
|------------------------------------------|

Now, we would like you to think about your most severe lower back pain episode in the last 6 months.

11

**SA PER ROW**

For each of the following, please cross one box to indicate if it applies to you.

|   |                                                                                   | <b>YES<br/>1</b>         | <b>NO<br/>2</b>          |
|---|-----------------------------------------------------------------------------------|--------------------------|--------------------------|
| 1 | You walked shorter distances than usual because of your lower back pain           | <input type="checkbox"/> | <input type="checkbox"/> |
| 2 | You limited your usual activities because of your lower back pain                 | <input type="checkbox"/> | <input type="checkbox"/> |
| 3 | You dressed more slowly than usual because of your lower back pain                | <input type="checkbox"/> | <input type="checkbox"/> |
| 4 | You had worrying thoughts because of your lower back pain                         | <input type="checkbox"/> | <input type="checkbox"/> |
| 5 | You worried that your lower back pain would never get better                      | <input type="checkbox"/> | <input type="checkbox"/> |
| 6 | You stopped enjoying the things you used to enjoy because of your lower back pain | <input type="checkbox"/> | <input type="checkbox"/> |

**PART 7: ADDITIONAL DEMOS**

**D1**

**US Specific**

What is your marital status?

**SA**

- \_1 Single, never married
- \_2 Living with partner
- \_3 Married
- \_4 Widowed
- \_5 Divorced or separated

**Russia Specific**

Каково Ваше семейное положение. ?

(Выберите один вариант ответа)

**SA**

- \_6 Холост / не замужем
- \_7 Гражданский брак
- \_8 Женат / замужем
- \_9 Живу отдельно (не разведен(а))
- \_10 В официальном разводе
- \_11 Вдова / вдовец

**Germany Specific**

Sind Sie ...

(Bitte eine Antwort auswählen)

**SA**

- 12. Verheiratet oder in einer nichtehelichen Partnerschaft lebend
- 13. Verwitwet
- 14. Alleinstehend/nie verheiratet
- 15. Geschieden/getrennt lebend
- 16. In einer häuslichen Lebensgemeinschaft
- 17. Ich möchte hierzu keine Angabe machen

**China Specific**

请问您目前的婚姻状况是?

(单选)

|    |                       |          |
|----|-----------------------|----------|
| 18 | Single, never married | 单身，没有结过婚 |
| 19 | Married/ cohabitation | 已婚/同居    |
| 20 | Widowed               | 丧偶       |
| 21 | Divorced              | 离异       |
| 22 | Separated             | 分居       |
| 23 | Don't Know/Refuse     | 不知道/拒绝回答 |



**D2**

Including yourself, how many people are living in your household?

Please type in

**NUMERIC – RANGE 1 - 30**

Number of people in household \_\_\_\_\_

**SKIP D3 IF 1 AT D2****D3**

Do you have children aged 18 or under living in your household?

**SA**

1. Yes
2. No

**D5****US Specific**

Into which category does your **PERSONAL** pre-tax annual income from all sources fall? Please take into consideration all your income sources: salaries, scholarships, pension and Social Security payments, dividends from shares, income from rental properties, child support and alimony etc. Please note that we are not interested in the type of income source, only in your personal and total annual income. Please select one answer only.

**SA**

1. Under \$5,000
2. \$5,000 to \$9,999
3. \$10,000 to \$14,999
4. \$15,000 to \$19,999
5. \$20,000 to \$24,999
6. \$25,000 to \$29,999
7. \$30,000 to \$34,999
8. \$35,000 to \$39,999
9. \$40,000 to \$44,999
10. \$45,000 to \$49,999
11. \$50,000 to \$54,999
12. \$55,000 to \$59,999
13. \$60,000 to \$64,999
14. \$65,000 to \$69,999
15. \$70,000 to \$74,999
16. \$75,000 to \$79,999
17. \$80,000 to \$84,999
18. \$85,000 to \$89,999
19. \$90,000 to \$94,999
20. \$95,000 to \$99,999
21. \$100,000 to \$124,999
22. \$125,000 to \$149,999
23. \$150,000 to \$199,999
24. \$200,000 to \$249,999
25. \$250,000 or more
26. Prefer not to say

**Russia Specific**

К какой категории относится **СОВОКУПНЫЙ ЧИСТЫЙ** месячный доход Вашего **ДОМОХОЗЯЙСТВА** с учетом всех источников (т.е. доход после вычета налогов)?

Укажите все источники доходов, включая заработную плату, стипендию, пенсию и пособия социального страхования, дивиденды на акции, доход от аренды собственности, пособие на детей и алименты и т. д. Обратите внимание на то, что нас не интересует вид источника дохода, а только совокупный месячный доход всех членов домохозяйства.

**SA**

- \_27 Менее 3 000 Рублей
- \_28 3 000 – 5 000 Рублей
- \_29 5 001 – 7 000 Рублей
- \_30 7 001 – 10 000 Рублей
- \_31 10 001 – 15 000 Рублей
- \_32 15 001 – 20 000 Рублей
- \_33 20 001 – 30 000 Рублей
- \_34 Более 30 000 Рублей
- \_35 Воздержусь от ответа

**Germany Specific**

Wie hoch ist das GEMEINSAME monatliche NETTOEINKOMMEN (nach Steuern) IHRES HAUSHALTS – das von allen Mitgliedern des Haushalts verdient wird?

Beziehen Sie ALLE Einnahmen aller Haushaltsmitglieder aus allen Einnahmequellen ein, z. B.: Löhne/Gehälter, Stipendien, Rente/ Sozialleistungen, Dividenden aus Aktienbesitz, Mieteinnahmen, Unterhalt, Alimente, etc. Wir sind nicht an der Art der Einkommensquelle interessiert, nur am monatlichen Gesamteinkommen, das von allen Mitgliedern des Haushalts verdient wird

**SA**

- \_36 €0 - €500
- \_37 €501-750
- \_38 €751-1000
- \_39 €1001-1250
- \_40 €1251-1500
- \_41 €1501-1750
- \_42 €1751-2000
- \_43 €2001-2500
- \_44 €2501-3000
- \_45 €3001-4000
- \_46 €4001-5000
- \_47 €5001-10,000
- \_48 €10,001 und mehr
- \_49 Keine Antwort

## China Specific

|    | 下面哪一项最能代表您家庭每月的总收入呢？请包括所有奖金，工资，津贴等在内。 | Please choose the group which represents your monthly household income. |
|----|---------------------------------------|-------------------------------------------------------------------------|
| 50 | 800元以下                                | Below 800 yuan                                                          |
| 51 | 800-999元                              | 800 – 999yuan                                                           |
| 52 | 1000-1199元                            | 1000 – 1199yuan                                                         |
| 53 | 1200-1499元                            | 1200 – 1499yuan                                                         |
| 54 | 1500-1999元                            | 1500 – 1999yuan                                                         |
| 55 | 2000-2499元                            | 2000 – 2499yuan                                                         |
| 56 | 2500-2999元                            | 2500 – 2999yuan                                                         |
| 57 | 3000-3499元                            | 3000 – 3499yuan                                                         |
| 58 | 3500-3999元                            | 3500 – 3999yuan                                                         |
| 59 | 4000-4499元                            | 4000 – 4499yuan                                                         |
| 60 | 4500-4999元                            | 4500 – 4999yuan                                                         |
| 61 | 5000-5499元                            | 5000 – 5499yuan                                                         |
| 62 | 5500-5999元                            | 5500 – 5999yuan                                                         |
| 63 | 6000-6499元                            | 6000 – 6499yuan                                                         |
| 64 | 6500-6999元                            | 6500 – 6999yuan                                                         |
| 65 | 7000-7499元                            | 7000 – 7499yuan                                                         |
| 66 | 7500-7999元                            | 7500 – 7999yuan                                                         |
| 67 | 8000-8999元                            | 8000 – 8999yuan                                                         |
| 68 | 9000-9999元                            | 9000 – 9999yuan                                                         |
| 69 | 10000-14999元                          | 10000 – 14999yuan                                                       |
| 70 | 15000-19999元                          | 15000 – 19999yuan                                                       |
| 71 | 20000-24999元                          | 20000 – 24999yuan                                                       |
| 72 | 25000-29999元                          | 25000 – 29999yuan                                                       |
| 73 | 30000或以上                              | 30000 or more                                                           |
| 74 | 不知道 / 拒绝回答                            | Not know / refuse to answer                                             |

**US ONLY**

**D6**

So that we know we are interviewing people of all backgrounds, which of the following best describes your ethnic or racial background?

Please select one answer only.

**SA**

1. Asian or Pacific Islander
2. Black or African American
3. Caucasian or White
4. Hispanic
5. American Indian, Eskimo or Aleutian
6. Some other group

**S20**

**US Specific**

What is your current employment status?

- \_1 Employed full-time
- \_2 Employed part-time
- \_3 Self employed
- \_4 Unemployed but looking for a job
- \_5 Unemployed and not looking for a job
- \_6 Full-time parent, homemaker
- \_7 Retired
- \_8 Student/Pupil

**WORKINGSTATUS\_1**

**SINGLE PUNCH**

**\_1 Working IF S20 =1 OR 2 OR 3**

**\_2 Not Working IF S20 =4 OR 5 OR 6 OR 7 OR 8**

### Russia Specific

Статус занятости

Выберите пожалуйста один ответ

**SA**

- \_9 Полный рабочий день
- \_10 Не полный рабочий день
- \_11 Имеете собственное дело / являетесь работодателем
- \_12 Работаете внештатно / работаете на себя
- \_13 Безработный (-ая), но ищущую работу
- \_14 Безработный (-ая) и не ищущую работу / никогда не работал
- \_15 Домохозяйка
- \_16 Пенсионер
- \_17 Школьник / студент / обучение на дневном отделении
- \_18 Призывник

### **WORKINGSTATUS\_1**

#### **SINGLE PUNCH**

- \_1 Working IF S20 =9 OR 10 OR 12 or 11**
- \_2 Not Working IF S20 =13 OR 14 OR 15 OR 16 OR 17 or 18**

### Germany Specific

Was ist Ihr gegenwärtiger Beschäftigungsstatus?

Bitte eine Möglichkeit auswählen

- \_19 Vollzeit
- \_20 Teilzeit
- \_21 Selbstständig
- \_22 Arbeitslos aber auf der Suche nach einem Job
- \_23 Arbeitslos und nicht auf der Suche nach einem Job/ arbeitsunfähig
- \_24 Hausmann/ Hausfrau
- \_25 In Rente
- \_26 Student/ Schüler/ ganztägig in der Ausbildung

### **WORKINGSTATUS\_1**

#### **SINGLE PUNCH**

- \_1 Working IF S20 =19 OR 20 OR 21**
- \_2 Not Working IF S20 =22 OR 23 OR 24 OR 25 OR 26**

### China Specific

Which of these best describes your current working status? 您目前的工作状况与以下哪项描述最为贴近？

- |    |                      |       |
|----|----------------------|-------|
| 27 | Full-time            | 全职    |
| 28 | Part-time            | 兼职    |
| 29 | Housewife / Houseman | 理家    |
| 30 | Currently unemployed | 目前失业中 |
| 31 | Retired              | 退休    |
| 32 | Apprentice           | 学徒    |
| 33 | Pupil / student      | 学生    |

**WORKINGSTATUS\_1**

**SINGLE PUNCH**

**\_1 Working IF S20 =27 OR 28**

**\_2 Not Working IF S20 =29 OR 30 OR 31 OR 32 OR 33**

**D4**

**IF CODE 1 OR 2 OR 3 OR 9 OR 10 OR 11 OR 12 OR 19 OR 20 OR 21 OR 27 OR 28 AT S20**

What is your current occupation?

Please select one answer only.

**SA**

|     |                                                      |
|-----|------------------------------------------------------|
| 1   | Agricultural and fishery worker                      |
| 2   | Building and road construction worker                |
| 3   | Craft and related trades worker                      |
| 4   | Fire department/police/army worker                   |
| 5   | Health care professional/nursing/elderly care worker |
| 6   | Legislator, senior official or manager               |
| 7   | Mover                                                |
| 8   | Office worker                                        |
| 9   | Plant and machine operator or assembler              |
| 10  | Professional                                         |
| 11  | Professional sportsman/woman or dancer               |
| 12  | Retail worker                                        |
| 13  | School teacher                                       |
| 14  | Service worker                                       |
| 15  | Sport and fitness industry worker                    |
| 16  | Transport services or industry worker                |
| 998 | Other, - please specify:<br>/ _____ /                |

PROFILING

# Identification of Long-Lasting Lower Back Pain Sufferers Among Step 1 Survey Respondents Based on Index Analyses

## PROFILING

# Using indexes to identify the specificities of long-lasting back pain sufferers

- The objective of this exercise was to understand the differences of long-lasting back pain sufferers compared to other back pain sufferers.
- To do this, we indexed their scores versus all back pain sufferers.
  - Index values were used to compare the profiles of long-lasting acute back pain sufferers identified in Step 1 with the profiles of the national representative population for each country
  - Index values were calculated by dividing the percentage of long-lasting acute back pain sufferers in the surveyed sample by the percentage obtained for the national representative population for each country
- If the index reaches a level of 100, it means that the long-lasting back pain sufferers have the same profile as all back pain sufferers.
- With an index of  $\geq 120$ , we consider a criteria to be significantly higher than in the reference population and therefore better defining the long-lasting back pain sufferers.
- With an index of 80 or lower we consider the criteria to less well define long lasting pain sufferers.

**Indexes of  $\geq 120$  were evaluated to understand the criteria that better define long-lasting back pain sufferers.**



# Long-lasting back pain was more common in people aged 45–60 years in all countries except the US. Long-lasting back pain sufferers were more likely to live in large metropolitan areas (eg, Middle Atlantic/Berlin/Northern China)

■ = indexes ≥120. ■ = indexes ≤80.

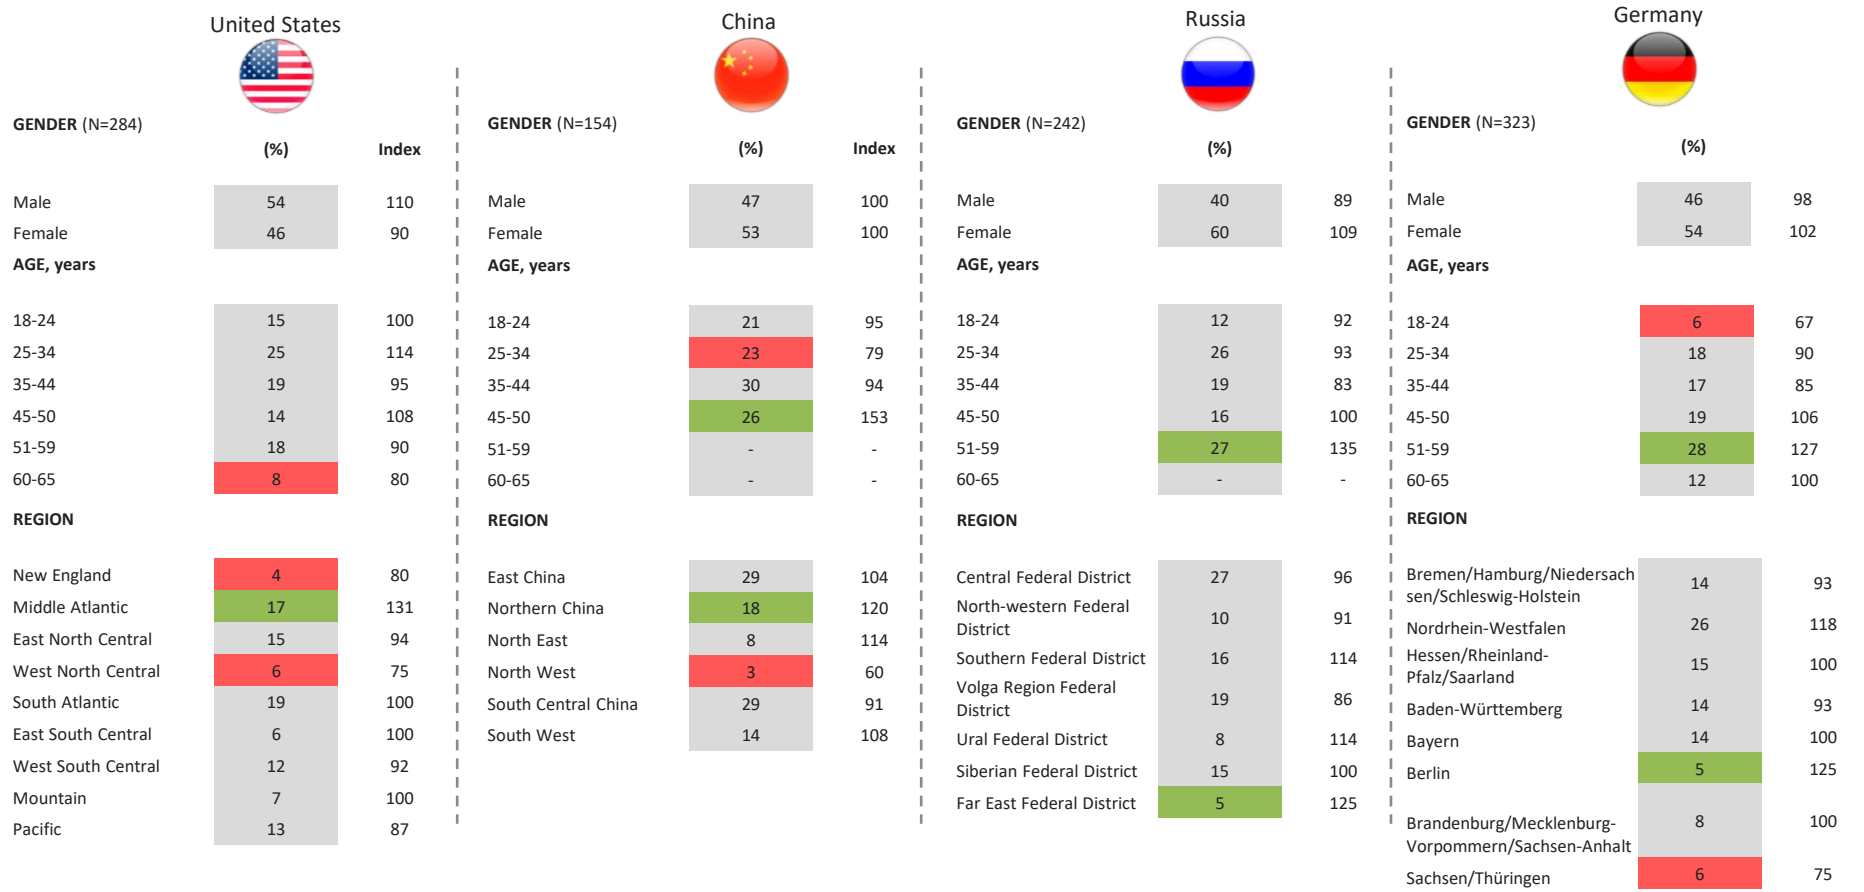

# Agricultural and fishery workers tended to suffer more from long-lasting back pain, as well as construction workers and school teachers

= indexes ≥120.  = indexes ≤80.

## EMPLOYMENT STATUS (N=284)

|                                  | (%) | Index |
|----------------------------------|-----|-------|
| United States                    |     |       |
| Employed full-time               | 49  | 92    |
| Employed part-time               | 14  | 108   |
| Self employed                    | 10  | 143   |
| Unemployed looking for a job     | 1   | 33    |
| Unemployed not looking for a job | 7   | 140   |
| Full-time parent, homemaker      | 6   | 86    |
| Retired                          | 9   | 129   |
| Student/Pupil                    | 4   | 80    |

## EMPLOYMENT STATUS (N=154)

|                      | (%) | Index |
|----------------------|-----|-------|
| China                |     |       |
| Employed full-time   | 86  | 100   |
| Employed part-time   | 4   | 100   |
| Housewife / Houseman | -   | -     |
| Currently unemployed | 2   | 100   |
| Retired              | 1   | 100   |
| Apprentice           | -   | -     |
| Pupil / student      | 6   | 86    |

## EMPLOYMENT STATUS (N=242)

|                                  | (%) | Index |
|----------------------------------|-----|-------|
| Russia                           |     |       |
| Employed full-time               | 65  | 103   |
| Employed part-time               | 5   | 71    |
| Have your own business           | 3   | 100   |
| Self-employed                    | 5   | 100   |
| Unemployed looking for a job     | 5   | 100   |
| Unemployed not looking for a job | 1   | -     |
| Housewife / Houseman             | 6   | 86    |
| Retired                          | 7   | 140   |
| Student/Pupil                    | 4   | 100   |

## EMPLOYMENT STATUS (N=323)

|                                  | (%) | Index |
|----------------------------------|-----|-------|
| Germany                          |     |       |
| Employed full-time               | 49  | 94    |
| Employed part-time               | 18  | 120   |
| Self employed                    | 4   | 67    |
| Unemployed looking for a job     | 4   | 133   |
| Unemployed not looking for a job | 3   | 100   |
| Housewife / Houseman             | 5   | 83    |
| Retired                          | 11  | 122   |
| Student/Pupil                    | 7   | 88    |

## OCCUPATION (N=207)

|                                       | (%) | Index |
|---------------------------------------|-----|-------|
| Agricultural and fishery workers      | 2   | 200   |
| Building/road construction workers    | 4   | 200   |
| Craft and related trades workers      | 2   | 100   |
| Fire department/police/army workers   | *   | -     |
| Health care workers                   | 6   | 86    |
| Legislators/senior officials/managers | 1   | 100   |
| Movers                                | -   | -     |
| Office workers                        | 13  | 76    |
| Plant-machine operators/assemblers    | 1   | 100   |
| Professionals                         | 28  | 100   |
| Professional sports/dancers           | *   | -     |
| Retail workers                        | 5   | 100   |
| School teachers                       | 10  | 143   |
| Service workers                       | 3   | 75    |
| Sport and fitness industry workers    | *   | -     |
| Transport services/industry workers   | 2   | 67    |

## OCCUPATION (N=139)

|                                       | (%) | Index |
|---------------------------------------|-----|-------|
| Agricultural and fishery workers      | 3   | 150   |
| Building/road construction workers    | 5   | 167   |
| Craft and related trades workers      | -   | -     |
| Fire department/police/army workers   | 1   | 100   |
| Health care workers                   | 1   | 100   |
| Legislators/senior officials/managers | 5   | 125   |
| Movers                                | -   | -     |
| Office workers                        | 45  | 88    |
| Plant-machine operators/assemblers    | 4   | 100   |
| Professionals                         | 14  | 108   |
| Professional sports/dancers           | -   | -     |
| Retail workers                        | 1   | 50    |
| School teachers                       | 9   | 113   |
| Service workers                       | 5   | 125   |
| Sport and fitness industry workers    | 1   | -     |
| Transport services/industry workers   | -   | -     |

## OCCUPATION (N=189)

|                                       | (%) | Index |
|---------------------------------------|-----|-------|
| Agricultural and fishery workers      | 4   | 200   |
| Building/road construction workers    | 11  | 138   |
| Craft and related trades workers      | 1   | 25    |
| Fire department/police/army workers   | 2   | 100   |
| Health care workers                   | 4   | 100   |
| Legislators/senior officials/managers | 1   | 100   |
| Movers                                | 1   | -     |
| Office workers                        | 21  | 100   |
| Plant-machine operators/assemblers    | 3   | 150   |
| Professionals                         | 15  | 88    |
| Professional sports/dancers           | -   | -     |
| Retail workers                        | 7   | 88    |
| School teachers                       | 3   | 150   |
| Service workers                       | 6   | 100   |
| Sport and fitness industry workers    | 1   | 100   |
| Transport services/industry workers   | 7   | 100   |

## OCCUPATION (N=229)

|                                       | (%) | Index |
|---------------------------------------|-----|-------|
| Agricultural and fishery workers      | *   | -     |
| Building/road construction workers    | *   | -     |
| Craft and related trades workers      | 7   | 117   |
| Fire department/police/army workers   | *   | -     |
| Health care workers                   | 6   | 75    |
| Legislators/senior officials/managers | 4   | 100   |
| Movers                                | 1   | -     |
| Office workers                        | 37  | 97    |
| Plant-machine operators/assemblers    | 3   | 150   |
| Professionals                         | 8   | 89    |
| Professional sports/dancers           | -   | -     |
| Retail workers                        | 7   | 100   |
| School teachers                       | 2   | 100   |
| Service workers                       | 2   | 100   |
| Sport and fitness industry workers    | *   | -     |
| Transport services/industry workers   | 2   | 67    |

## PROFILING

 = indexes  $\geq 120$ .  = indexes  $\leq 80$ .

|                                     | United States (%) | Index |
|-------------------------------------|-------------------|-------|
| <b>SIZE OF HH</b><br>(N=284)        |                   |       |
| 1 to 3                              | 55                | 86    |
| 4 or more                           | 43                | 130   |
| <b>CHILDREN IN HH</b><br>(N=255)    |                   |       |
| Yes                                 | 54                | 113   |
| No                                  | 46                | 88    |
| <b>ETHNIC BACKGROUND</b><br>(N=284) |                   |       |
| Asian or Pacific Islander           | 3                 | 60    |
| Black/African American              | 2                 | 50    |
| Caucasian or White                  | 86                | 105   |
| Hispanic                            | 6                 | 100   |
| American Indian/<br>Eskimo/Aleutian | 1                 | 100   |
| Some other group                    | 1                 | 100   |

|                                  | China (%) | Index |
|----------------------------------|-----------|-------|
| <b>SIZE OF HH</b><br>(N=154)     |           |       |
| 1 to 3                           | 59        | 97    |
| 4 or more                        | 41        | 105   |
| <b>CHILDREN IN HH</b><br>(N=152) |           |       |
| Yes                              | 64        | 94    |
| No                               | 36        | 113   |

|                                  | Russia (%) | Index |
|----------------------------------|------------|-------|
| <b>SIZE OF HH</b><br>(N=242)     |            |       |
| 1 to 3                           | 59         | 91    |
| 4 or more                        | 41         | 117   |
| <b>CHILDREN IN HH</b><br>(N=230) |            |       |
| Yes                              | 64         | 105   |
| No                               | 36         | 92    |

|                                  | Germany (%) | Index |
|----------------------------------|-------------|-------|
| <b>SIZE OF HH</b><br>(N=323)     |             |       |
| 1 to 3                           | 83          | 99    |
| 4 or more                        | 17          | 113   |
| <b>CHILDREN IN HH</b><br>(N=249) |             |       |
| Yes                              | 41          | 103   |
| No                               | 59          | 98    |

HH, household.

# TYPE AND INTENSITY OF LONG-LASTING BACK PAIN

**Persistent pain was not worse but tended to radiate to the middle and the lower part of the back**

Base: Long-lasting back pain sufferers  
NET 1<sup>st</sup>/ 2<sup>nd</sup>/3<sup>rd</sup> episode

■ = indexes ≥120

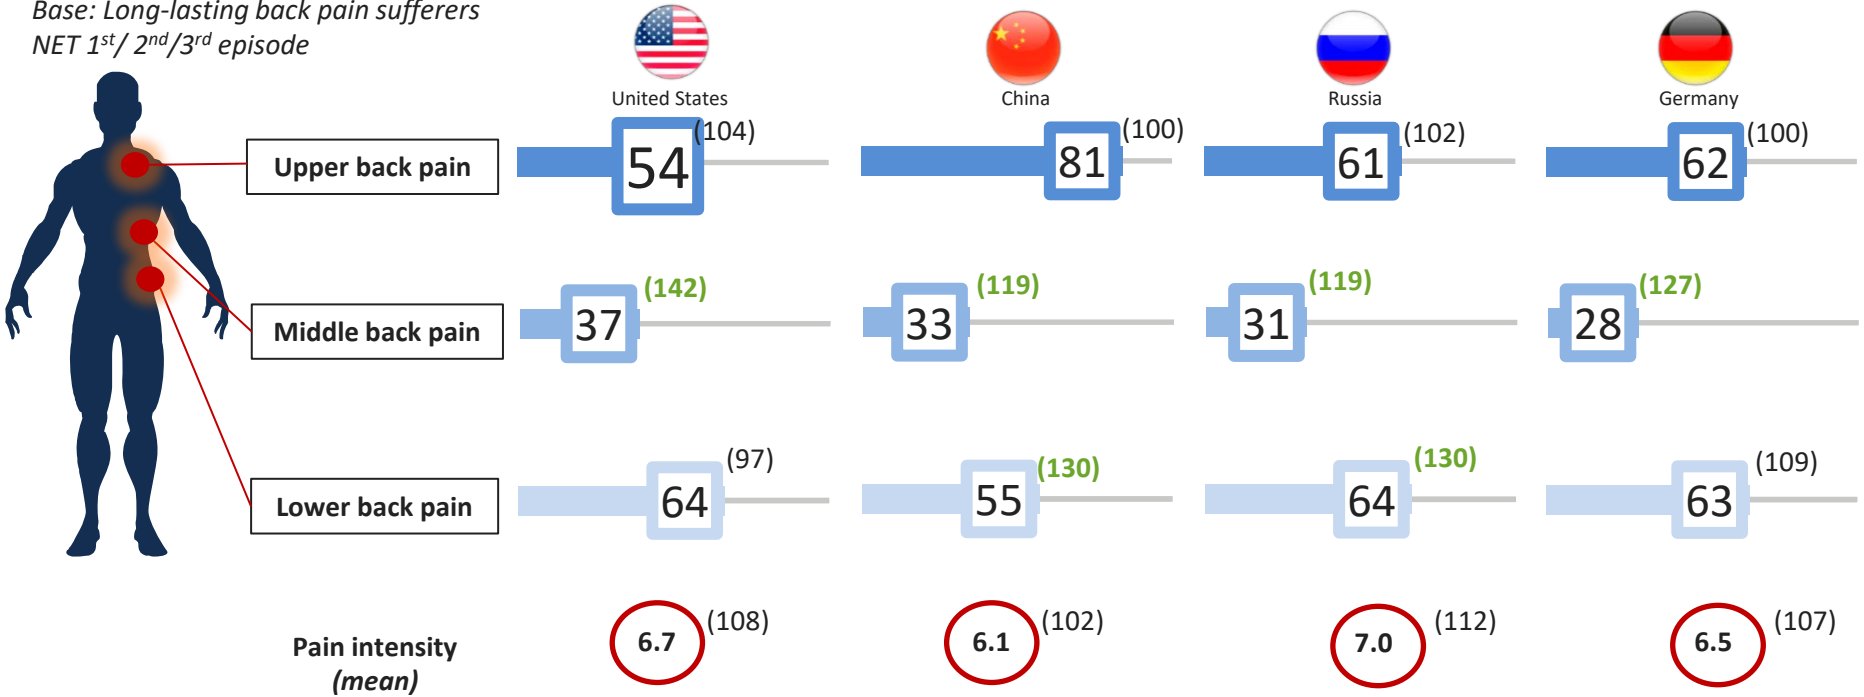

Q4 For each of these pain episodes in the past 6 months, would you say you mostly suffered from upper, middle or lower back pain?

Q5 Indicate how painful each back pain episode was to you. Please register the worst level of pain you experienced during each episode, by using a 0–10 point scale : 0 = No pain, 10 = Worst possible pain.

## BACK PAIN TREATMENTS

### Long-lasting back pain sufferers were more inclined to see a specialist

Base: Long-lasting back pain sufferers  
NET 1<sup>st</sup>/ 2<sup>nd</sup>/3<sup>rd</sup> episode

 = indexes ≥120

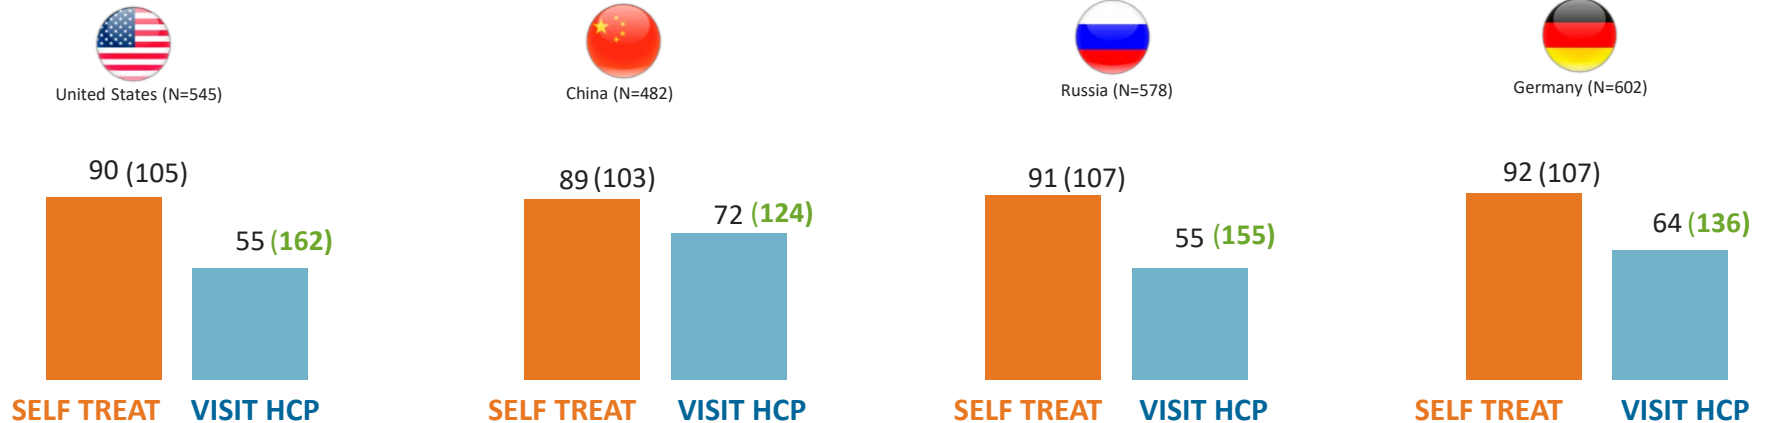

HCP, health care professional.

# TYPE OF TREATMENTS USED

 = indexes ≥120.

Base: Long-lasting back pain sufferers  
NET 1<sup>st</sup>/ 2<sup>nd</sup>/3<sup>rd</sup> episode

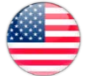

United States (N=242)

|                                        |    |       |
|----------------------------------------|----|-------|
| Non-prescription products              | 48 | (100) |
| Heat patches                           | 41 | (111) |
| Massage                                | 40 | (118) |
| Exercises                              | 38 | (119) |
| Prescription products                  | 30 | (167) |
| Cold patches                           | 28 | (140) |
| Bed rest                               | 27 | (113) |
| Physiotherapy                          | 19 | (190) |
| Devices for pain management            | 18 | (200) |
| Other natural treatment/home treatment | 18 | (164) |
| Herbal/ nutritional supplements        | 16 | (178) |
| Osteopath manipulation/osteopathy      | 14 | (175) |
| Strapping/taping                       | 13 | (217) |
| Homeopathic products/medicine          | 11 | (157) |
| Traditional Chinese Medicine           | 10 | (167) |

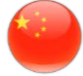

China (N=151)

|                                        |    |       |
|----------------------------------------|----|-------|
| Massage                                | 50 | (100) |
| Local Heat                             | 39 | (115) |
| Bed rest                               | 34 | (103) |
| Exercises                              | 29 | (126) |
| Osteopath manipulation/osteopathy      | 24 | (160) |
| Physiotherapy                          | 23 | (135) |
| Local cold                             | 17 | (121) |
| Prescription products                  | 16 | (145) |
| Non-prescription products              | 14 | (100) |
| Traditional Chinese Medicine           | 14 | (127) |
| Devices for pain management            | 13 | (144) |
| Homeopathic products/medicine          | 11 | (157) |
| Herbal/nutritional supplements         | 10 | (125) |
| Other natural treatment/home treatment | 10 | (143) |
| Strapping/taping                       | 6  | (86)  |

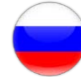

Russia (N=209)

|                                        |    |       |
|----------------------------------------|----|-------|
| Massage                                | 50 | (111) |
| Non-prescription products              | 46 | (115) |
| Exercises                              | 31 | (107) |
| Bed rest                               | 22 | (105) |
| Local heat                             | 27 | (129) |
| Physiotherapy                          | 16 | (145) |
| Homeopathic products/medicine          | 13 | (144) |
| Prescription products                  | 15 | (188) |
| Other natural treatment/home treatment | 11 | (157) |
| Herbal/ nutritional supplements        | 10 | (167) |
| Devices for pain management            | 7  | (175) |
| Local cold                             | 5  | (125) |
| Strapping/taping                       | 5  | (167) |
| Traditional Chinese Medicine           | 6  | (200) |
| Osteopath manipulation/osteopathy      | 5  | (250) |

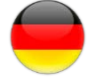

Germany (N=298)

|                                        |    |       |
|----------------------------------------|----|-------|
| Local heat                             | 42 | (117) |
| Prescription products                  | 37 | (142) |
| Massage                                | 34 | (131) |
| Non-prescription products              | 33 | (114) |
| Exercises                              | 32 | (110) |
| Physiotherapy                          | 26 | (144) |
| Bed rest                               | 15 | (115) |
| Devices for pain management            | 10 | (143) |
| Herbal/ nutritional supplements        | 7  | (117) |
| Local cold                             | 7  | (117) |
| Osteopath manipulation/osteopathy      | 7  | (117) |
| Strapping/taping                       | 7  | (140) |
| Homeopathic products/medicine          | 6  | (120) |
| Other natural treatment/home treatment | 6  | (120) |
| Traditional Chinese Medicine (TCM)     | 2  | (100) |

# TYPE OF HCP VISITED

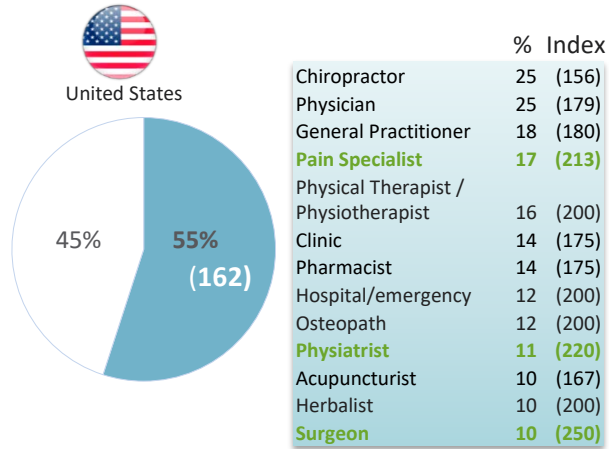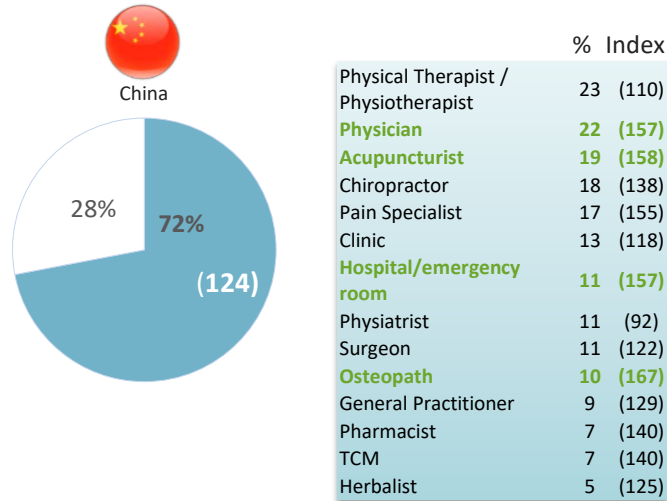

Do not visit any HCP for back pain  
 Visit HCP for Back pain

**Green** = HCPs with top 3 index scores per country

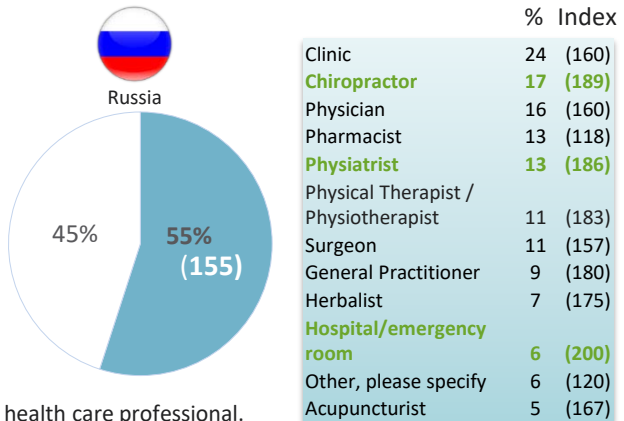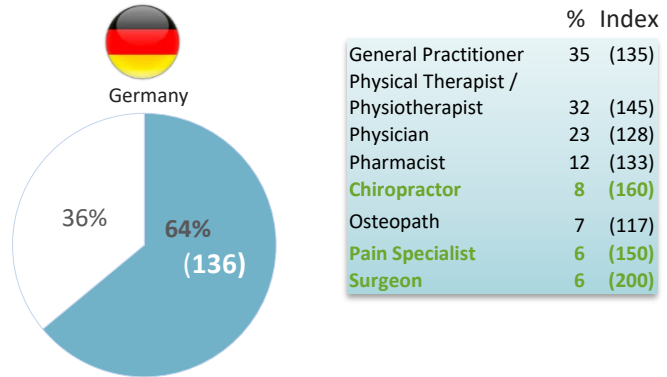

HCP, health care professional.

Q12 Which type of health care professional, if any, did you visit to treat your back pain in the last 6 months?

Base: Long-lasting back pain sufferers  
 NET 1<sup>st</sup>/ 2<sup>nd</sup>/3<sup>rd</sup> episode

## DRIVER ANALYSIS

# What are the causes of long-lasting back pain?

- The main objective of the driver analysis was to understand how specific “factors” (age/activity/occupation etc.) correlate with the origin of long-lasting back pain.
- **Why didn't we use only indexes/profiling? Because consumers don't look at each factor independently.**
- The driver analysis looked at factors simultaneously and implicitly weighted each factor relative to the others in causing long-lasting back pain.
- Each “factor” was then classified into one of five groups according to its relative importance in causing long-lasting back pain.
  - Highest importance: Index from 100 to 80
  - High importance: Index from 79 to 60
  - Moderate importance: Index from 59 to 40
  - Low importance: Index from 39 to 20
  - Lowest importance: Index from 19 to 1



**Sitting in front of a computer and bad posture were the most common triggers across countries. Housework or carrying groceries also led to long-lasting back pain. The sports of tennis, gym workouts, and athletics (and soccer in the US) were identified as common sport-related causes of long-lasting back pain.**

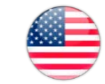

United States

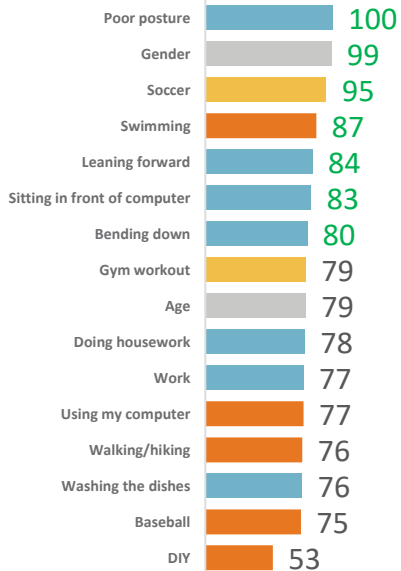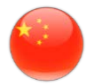

China

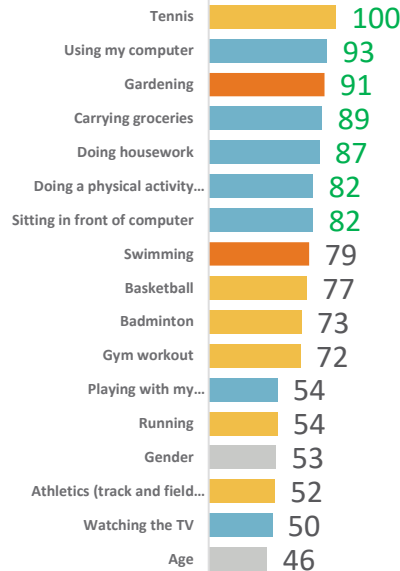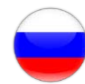

Russia

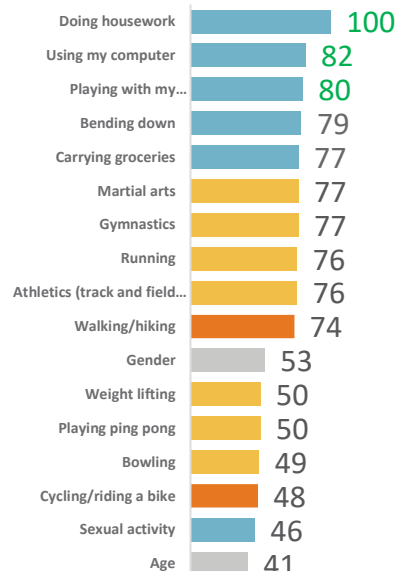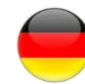

Germany

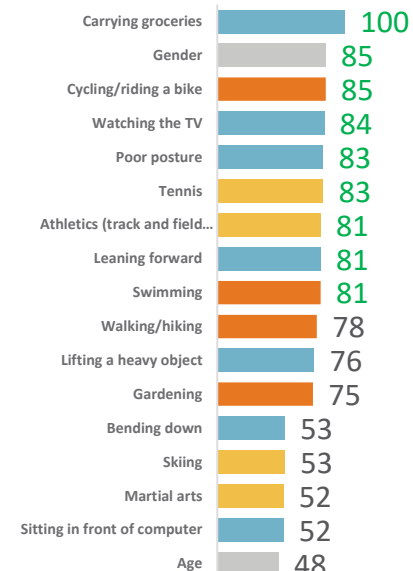

- Regular activities
- Sports
- Leisure activities

**Highest Importance: 100 to 80**  
 High Importance: 79 to 60  
 Moderate Importance: 59 to 40
